# Supplementary material
Source: PubMed Central journal article supplement (PMC3629982)
Supplement: NIHMS430896-supplement-Supporting_Information.pdf [file NIHMS430896-supplement-Supporting_Information.pdf]

## Supplementary Information

### **Total Synthesis of Potent Antitumor Macrolide, (-)-Zampanolide: An Oxidative Intramolecular Cyclization-Based Strategy**

**Arun K. Ghosh,\* Xu Cheng, Ruoli Bai, and Ernest Hamel**

<sup>1</sup>H NMR and <sup>13</sup>C NMR spectra for all new compounds and HPLC traces for compounds **1**, **16** and **39**.

H1 standard parameters, CDCl3, GNP probe.

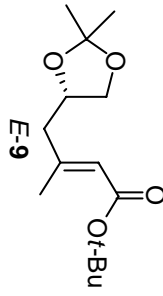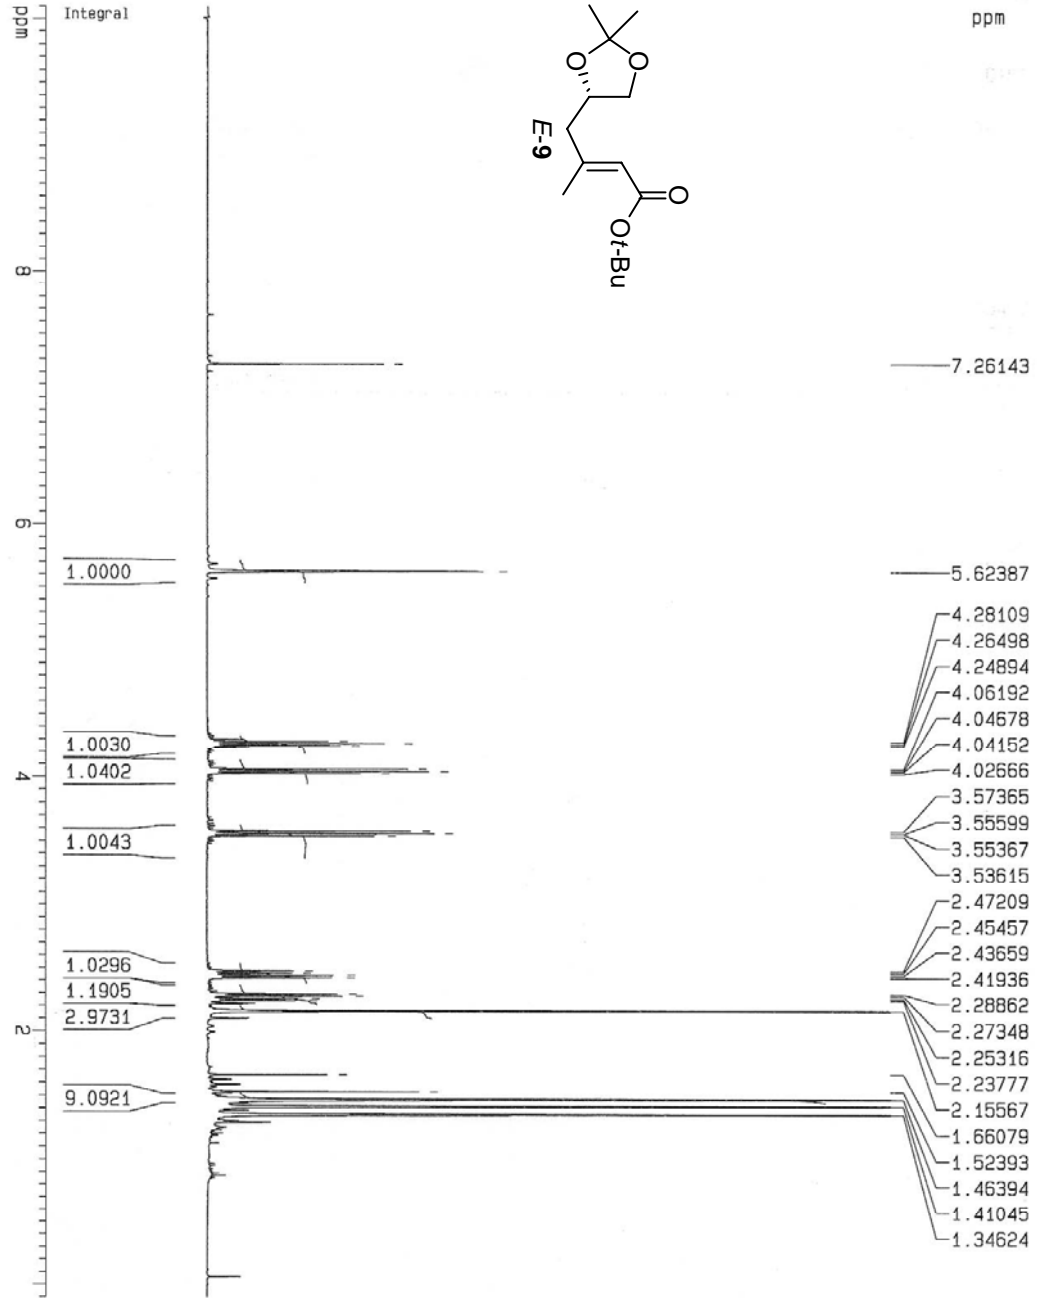

Current Data Parameters  
 NAME chx\_10\_027\_02  
 EXPNO 1  
 PROCNO 1

F2 - Acquisition Parameters  
 Date\_ 20120127  
 Time 20.32

INSTRUM spect  
 PROBHD 5 mm GNP 1H  
 PULPROG zg30

TD 16384  
 SOLVENT CDCl3  
 NS 10

DS 2  
 SMH 5617.978 Hz  
 FTIDRES 0.342894 Hz

AQ 1.4582280 sec  
 R5 360  
 DE 89.000 usec

TE 127.14 usec  
 D1 300.0 K  
 D4 2.00000000 sec

P1 9.50 usec  
 SF01 400.1694000 MHz  
 NUCLEUS 1H

F2 - Processing parameters  
 SI 8192  
 SF 400.1669660 MHz

KDN EM  
 SSB 0  
 LB 0.30 Hz

GB 0  
 PC 1.00

1D NMR plot parameters  
 CX 20.00 cm  
 F1P 10.100 ppm

F1 4041.69 Hz  
 F2P -0.100 ppm  
 F2 -40.02 Hz

PPMCM 0.51000 ppm/cm  
 HZCM 204.06516 Hz/cm

C13 standard parameters, CDCl3, QNP probe.

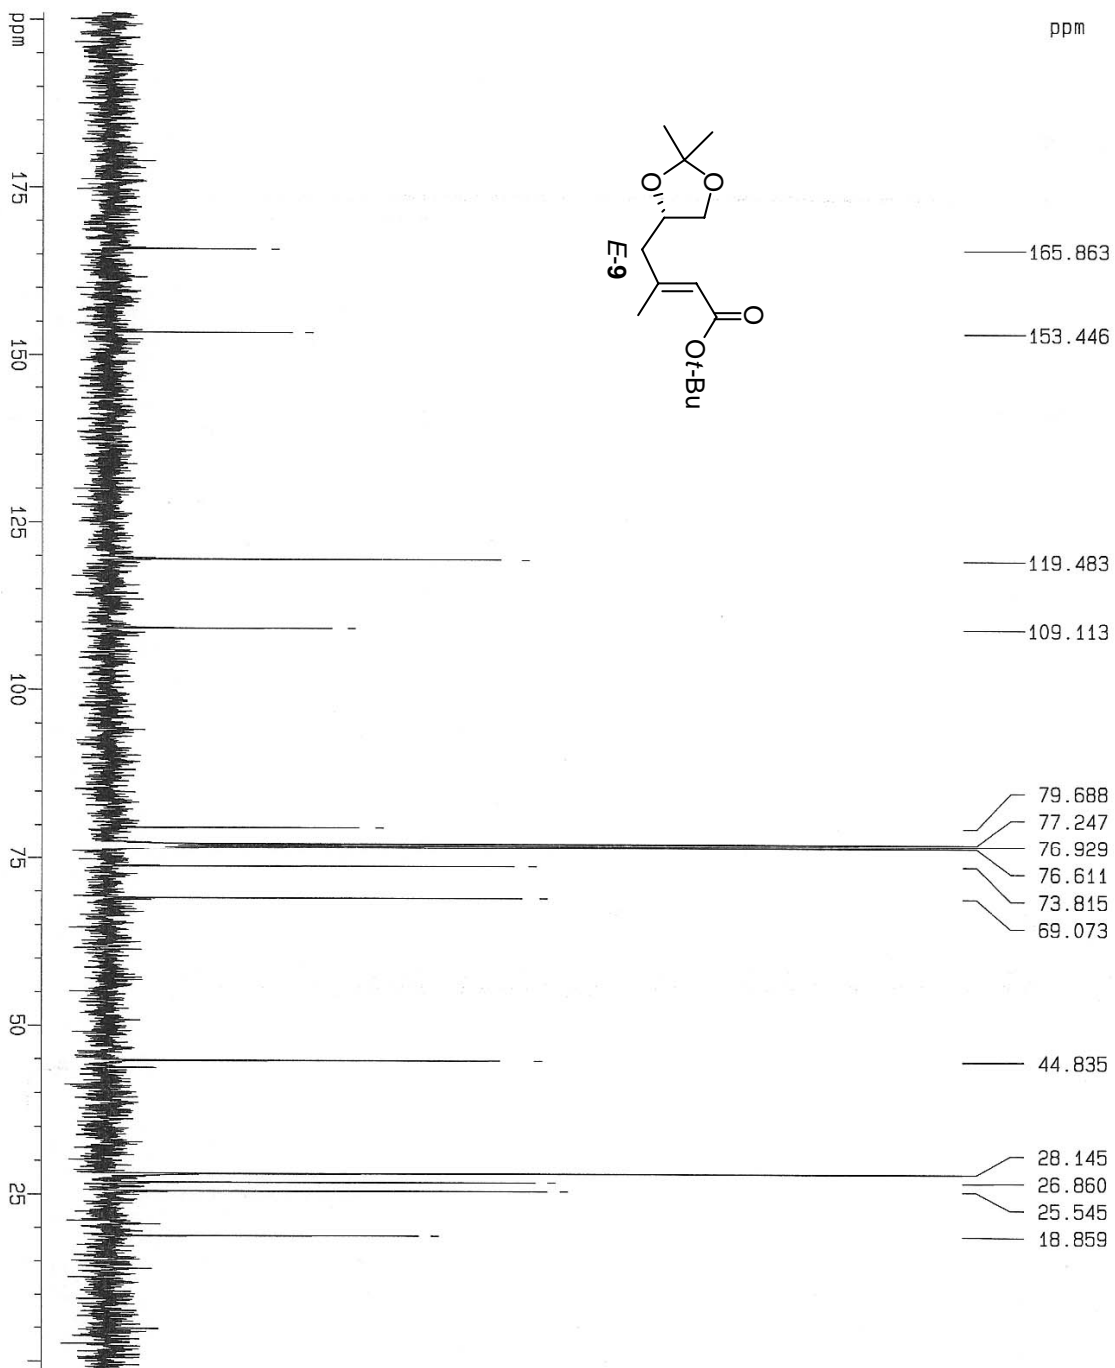

Current Data Parameters  
 NAME chx\_10\_027\_02  
 EXPNO 2  
 PROCNO 2

F2 - Acquisition Parameters  
 Date\_ 20120127  
 Time 20.34

INSTRUM spect  
 PROBHD 5 mm QNP 1H  
 PULPROG zgpg30  
 TD 32768  
 SOLVENT CDCl3  
 NS 83  
 DS 2

SWH 23809.523 Hz  
 FIDRES 0.726609 Hz  
 AQ 0.6881780 sec  
 RG 16384

DM 21.000 usec  
 DE 30.00 usec  
 TE 300.0 K  
 D12 0.0000200 sec  
 DL6 21.00 dB  
 D1 2.00000000 sec

CPDPRG waitz16  
 P31 76.00 usec  
 D11 0.0300000 sec  
 DL5 18.00 dB  
 P1 8.60 usec  
 SFO1 100.6330000 MHz  
 NUCLEUS 13C

F2 - Processing parameters  
 SI 16384  
 SF 100.6220720 MHz  
 WDW EM  
 SSB 0  
 LB 3.00 Hz  
 GB 0  
 PC 1.00

1D NMR plot parameters  
 CX 20.00 cm  
 F1P 201.000 DPM  
 F1 20225.04 Hz  
 F2P -1.000 ppm  
 F2 -100.62 Hz  
 PPMCM 10.10000 ppm/cm  
 HZCM 1016.28290 Hz/cm

H1 standard parameters, CDC13, QNP probe.

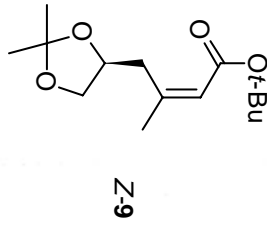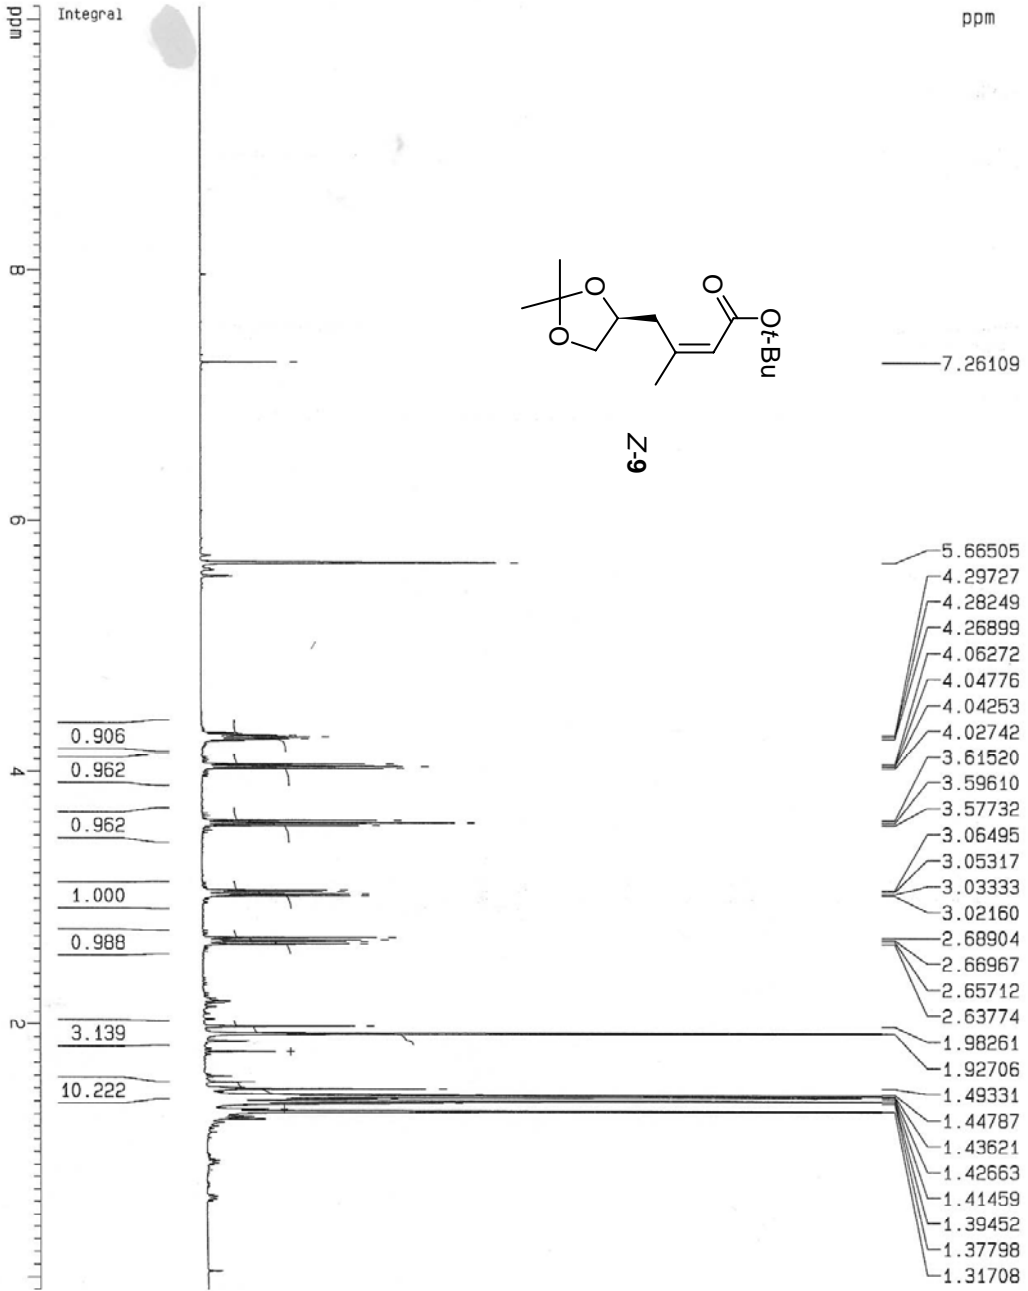

Current Data Parameters  
 NAME chx\_10\_027\_01  
 EXPNO 1  
 PROCNO 1

F2 - Acquisition Parameters  
 Date\_ 20120127  
 Time 20.19

INSTRUM spect  
 PQQBHD 5 mm QNP 1H  
 PULPROG zg30  
 TD 16384  
 SOLVENT CDC13

NS 16  
 DS 2  
 SMH 5617.978 Hz  
 FIDRES 0.342894 Hz

AQ 1.4592260 sec  
 RG 128  
 DM 89.000 usec  
 DE 127.14 usec  
 TE 300.0 K

D1 2.00000000 sec  
 P1 9.50 usec  
 SF01 400.1694000 MHz  
 NUCLEUS 1H

F2 - Processing parameters  
 SI 8192  
 SF 400.1669660 MHz  
 MDW EM  
 SSB 0  
 LB 0.30 Hz  
 GB 0  
 PC 1.00

1D NMR plot parameters  
 CX 20.00 cm  
 F1P 10.100 ppm  
 F1 4041.69 Hz  
 F2P -40.100 ppm  
 F2 -40.02 Hz  
 PPMCK 0.51000 ppm/cm  
 HZCK 204.08516 Hz/cm

C13 standard parameters, CDCl3, GNP probe.

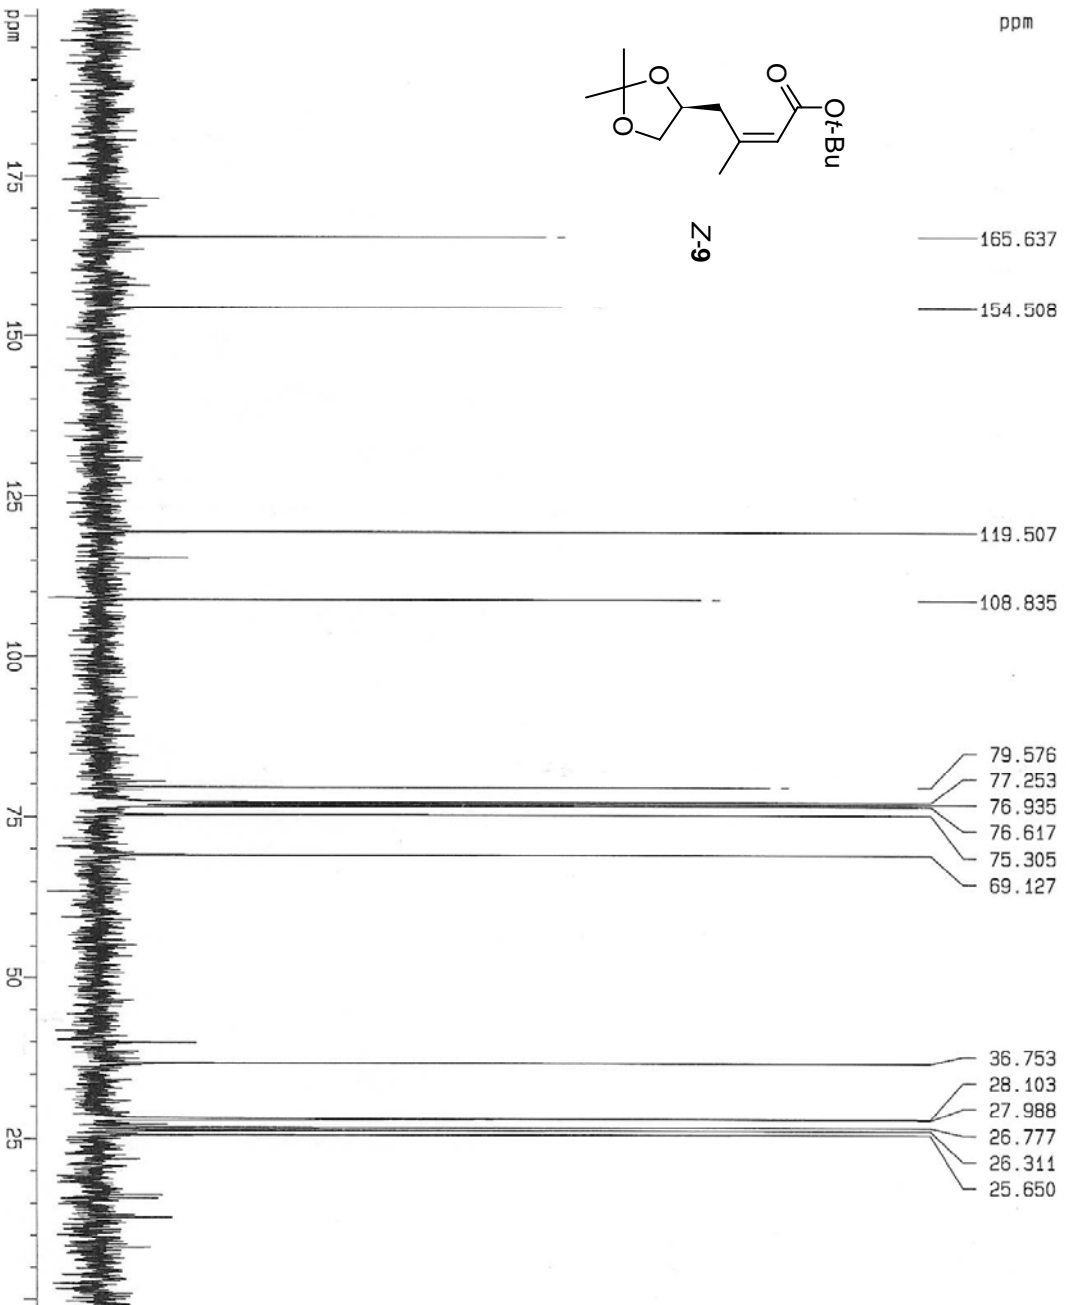

Current Data Parameters

|        |               |
|--------|---------------|
| NAME   | chx_10_027_01 |
| EXPNO  | 2             |
| PROCNO | 2             |

F2 - Acquisition Parameters

|         |                 |
|---------|-----------------|
| Date_   | 20120127        |
| Time    | 20.22           |
| INSTRUM | spect           |
| PROBHD  | 5 mm GNP 1H     |
| PULPROG | ZGPG30          |
| TD      | 32768           |
| SOLVENT | CDCl3           |
| NS      | 130             |
| DS      | 2               |
| SMH     | 23809.523 Hz    |
| FTIDRES | 0.728609 Hz     |
| AQ      | 0.6881780 sec   |
| R6      | 16384           |
| DW      | 21.000 usec     |
| DE      | 30.00 usec      |
| TE      | 300.0 K         |
| D12     | 0.0000200 sec   |
| DL6     | 21.00 dB        |
| D1      | 2.00000000 sec  |
| CPDPRG  | waitz16         |
| P34     | 76.00 usec      |
| D14     | 0.0300000 sec   |
| DL5     | 18.00 dB        |
| P1      | 8.60 usec       |
| SFO1    | 100.6330000 MHz |
| NUCLEUS | <sup>13</sup> C |

F2 - Processing parameters

|     |                 |
|-----|-----------------|
| SI  | 16384           |
| SF  | 100.6220720 MHz |
| KDN | EM              |
| SSB | 0               |
| LB  | 3.00 Hz         |
| GB  | 0               |
| PC  | 1.00            |

1D NMR plot parameters

|       |                  |
|-------|------------------|
| CX    | 20.00 cm         |
| F1P   | 201.000 ppm      |
| F1    | 20225.04 Hz      |
| F2P   | -1.000 ppm       |
| F2    | -100.52 Hz       |
| PPMCM | 10.10000 ppm/cm  |
| HZCM  | 1016.28290 Hz/cm |

H1 standard parameters, CDCl3, GNP probe.

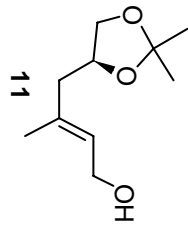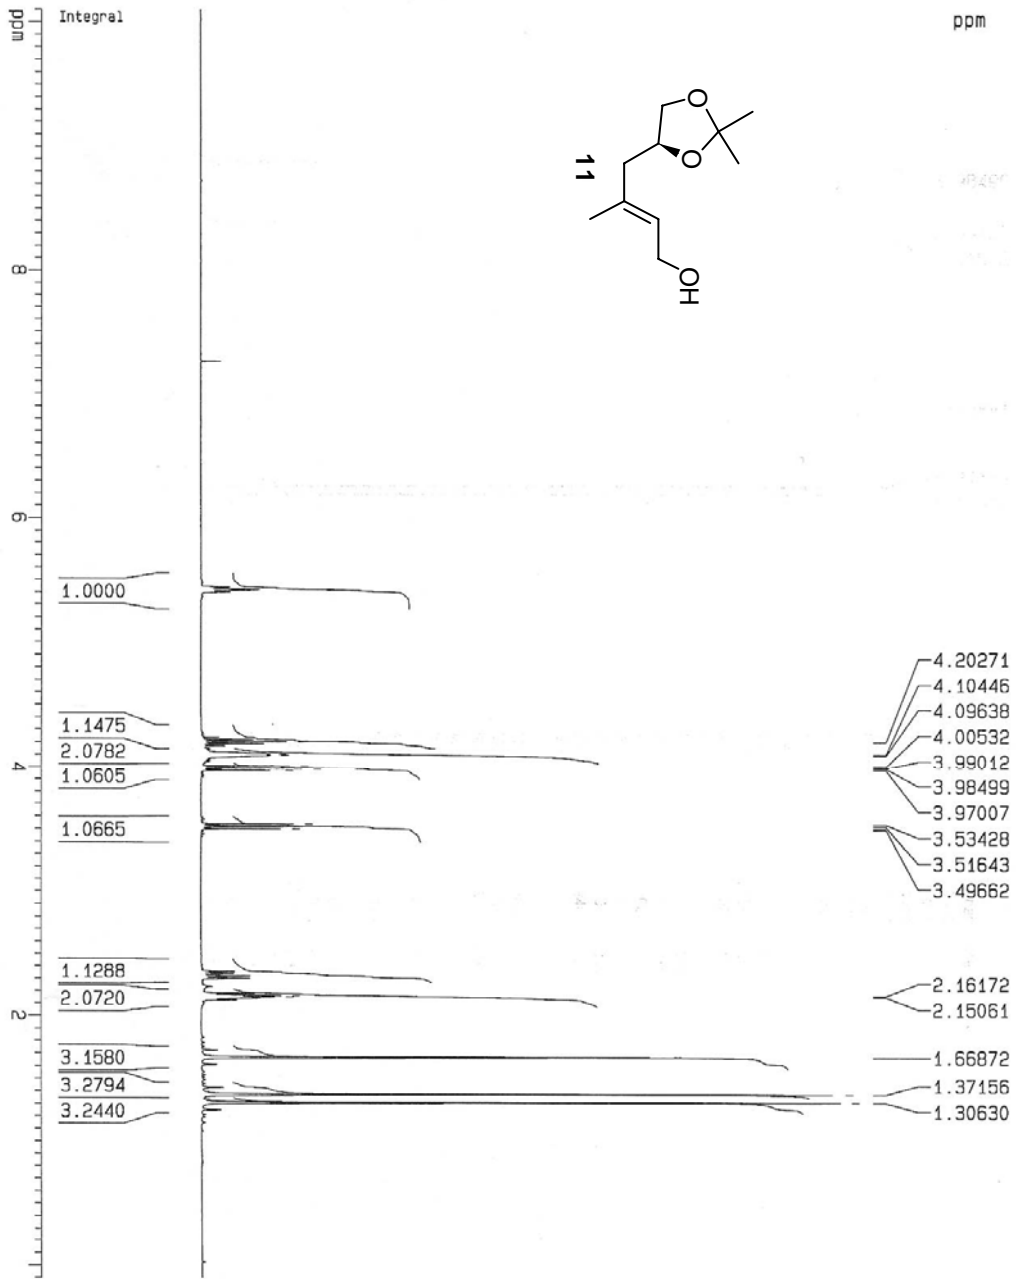

Current Data Parameters  
 NAME chx\_10\_0228\_02  
 EXPNO 1  
 PROCNO 1

F2 - Acquisition Parameters  
 Date\_ 20120128  
 Time 18:47

INSTRUM spect  
 PROBHD 5 mm GNP 1H  
 PULPROG zg30  
 TD 16384  
 SOLVENT CDCl3  
 NS 13  
 DS 2

SMH 5617.978 Hz  
 FIDRES 0.342894 Hz  
 AQ 1.4582260 sec  
 RG 128

DM 89.000 usec  
 DE 127.14 usec  
 TE 300.0 K  
 D1 2.00000000 sec  
 P1 9.50 usec  
 SFO1 400.1694000 MHz  
 NUCLEUS 1H

F2 - Processing parameters

SI 8192  
 SF 400.1669660 MHz  
 MDW EM  
 SSB 0  
 LB 0.30 Hz  
 GB 0  
 PC 1.00

1D NMR plot parameters

CX 20.00 cm  
 F1P 10.100 ppm  
 F1 4041.69 Hz  
 F2P -0.100 ppm  
 F2 -40.02 Hz  
 PPMCKM 0.51000 ppm/cm  
 HZCM 204.08516 Hz/cm

C13 standard parameters, CDCl3, QNP probe.

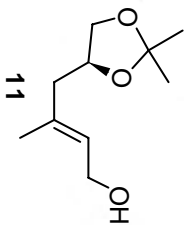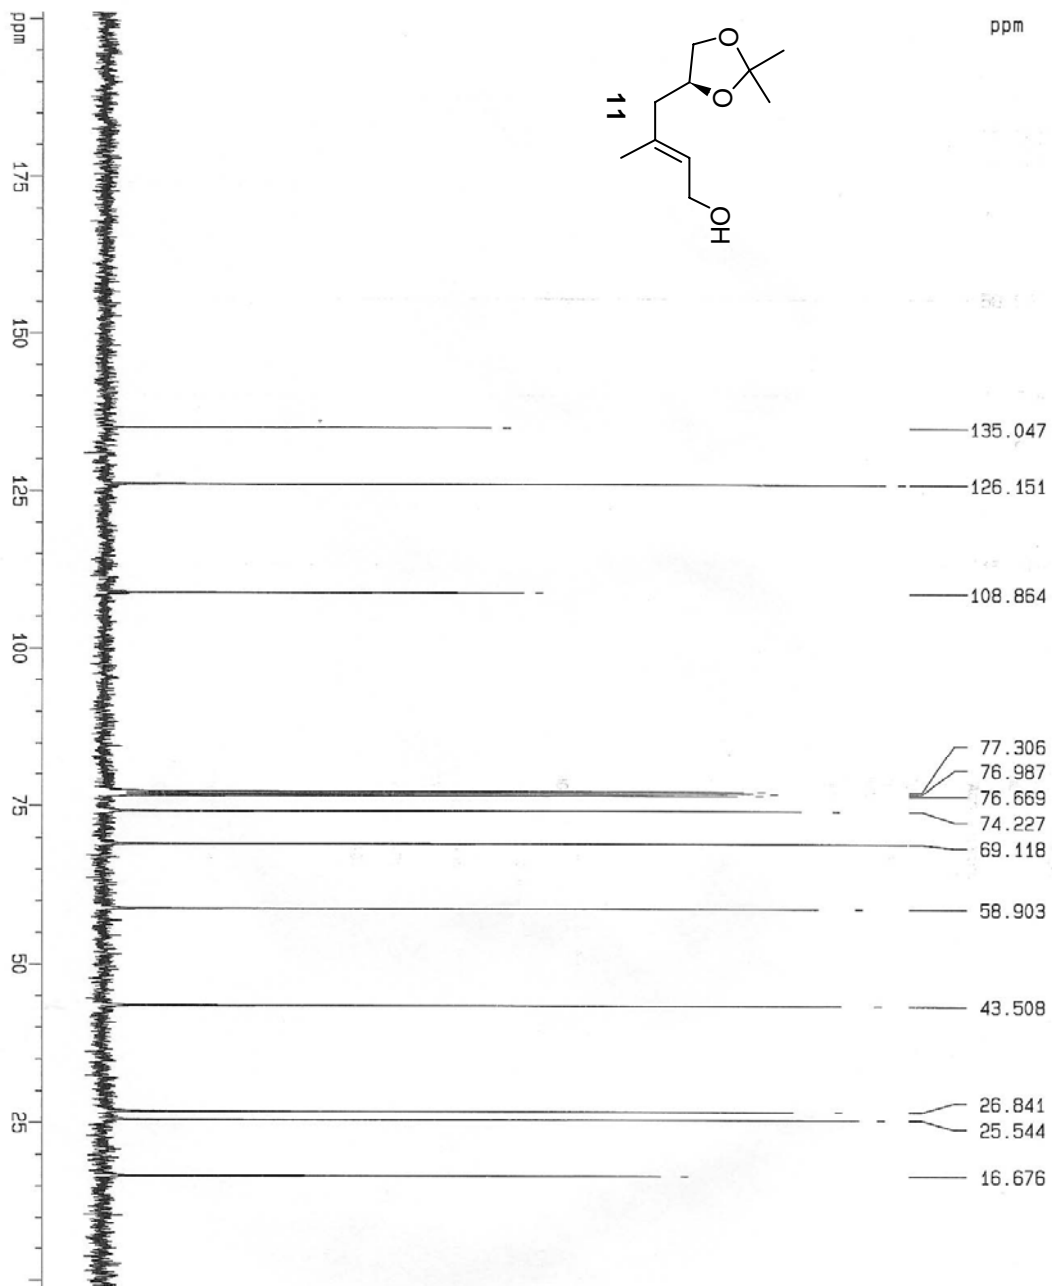

Current Data Parameters  
 NAME cfx\_10\_028\_02  
 EXPNO 2  
 PROCNO 2

F2 - Acquisition Parameters  
 Date\_ 20120128  
 Time 18.49

INSTRUM spect  
 PROBRID 5 mm QNP 1H  
 PULPROG zgpg30  
 TD 32768  
 SOLVENT CDCl3  
 NS 131  
 DS 2  
 SWH 23909.523 Hz  
 FIDRES 0.726609 Hz  
 AQ 0.6681780 sec  
 RG 16384  
 DM 21.000 usec  
 DE 30.00 usec  
 TE 300.0 K  
 D12 0.0000200 sec  
 DL6 21.00 dB  
 D1 2.00000000 sec  
 CPDPRG waltz16  
 P31 76.00 usec  
 D11 0.0300000 sec  
 DL5 18.00 dB  
 P1 8.50 usec  
 SFO1 100.6330000 MHz  
 NUCLEUS 13C

F2 - Processing parameters  
 S1 16384  
 SF 100.6220720 MHz  
 KDW EM  
 SSB 0  
 LB 3.00 Hz  
 GB 0  
 PC 1.00

1D NMR plot parameters  
 CX 20.00 cm  
 FAP 201.000 ppm  
 F1 20225.04 Hz  
 F2P -1.000 ppm  
 F2 -100.62 Hz  
 PPM1CM 10.10000 ppm/cm  
 HZCM 1016.28290 Hz/cm

H1 standard parameters, CDCl3, QNP probe.

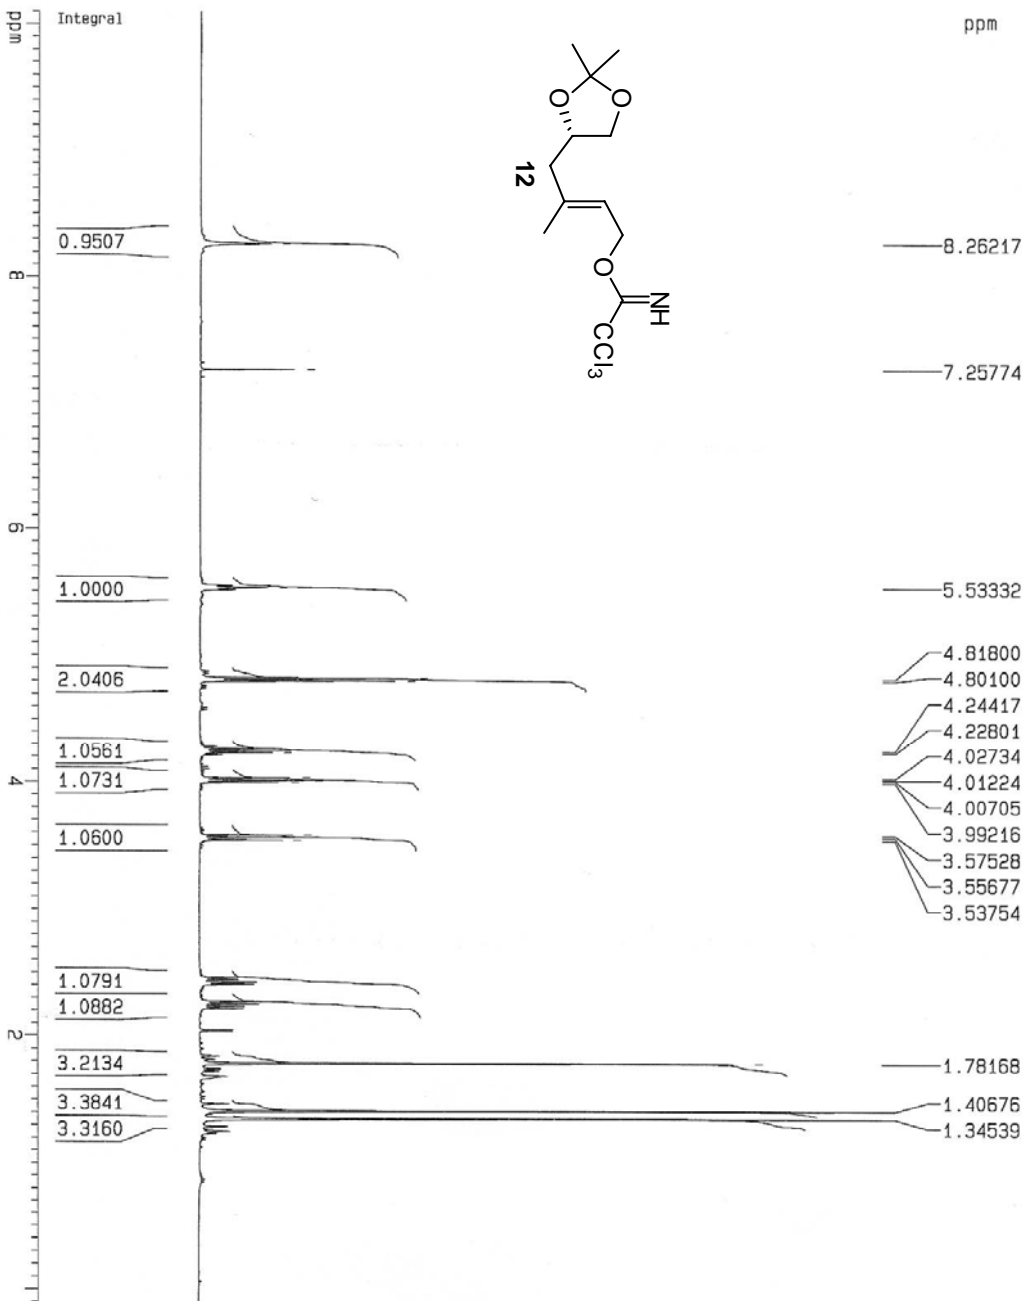

Current Data Parameters  
 NAME chx\_10\_030\_01  
 EXPNO 1  
 PROCNO 1

F2 - Acquisition Parameters  
 Date\_ 20120131  
 Time 21.16  
 INSTRUM spect  
 PROBRD 5 mm QNP 1H  
 PULPROG zg30  
 TD 16384  
 SOLVENT CDCl3  
 NS 8  
 DS 2  
 SWH 5617.978 Hz  
 FIDRES 0.342894 Hz  
 AQ 1.4582260 sec  
 RG 715  
 DM 89.000 usec  
 DE 127.14 usec  
 TE 300.0 K  
 D1 2.00000000 sec  
 P1 9.50 usec  
 SF01 400.1694000 MHz  
 NUCLEUS 1H

F2 - Processing parameters  
 SI B192  
 SF 400.1699660 MHz  
 WDW EM  
 SSB 0  
 LB 0.30 Hz  
 GB 0  
 PC 1.00

1D NMR plot parameters  
 CX 20.00 cm  
 F1P 10.100 ppm  
 F1 4041.69 Hz  
 F2P -0.100 ppm  
 F2 -40.02 Hz  
 PPKCN 0.51000 ppm/cm  
 HZCX 204.08516 Hz/cm



<sup>13</sup>C standard parameters, CDCl<sub>3</sub>, QNP probe.

ppm

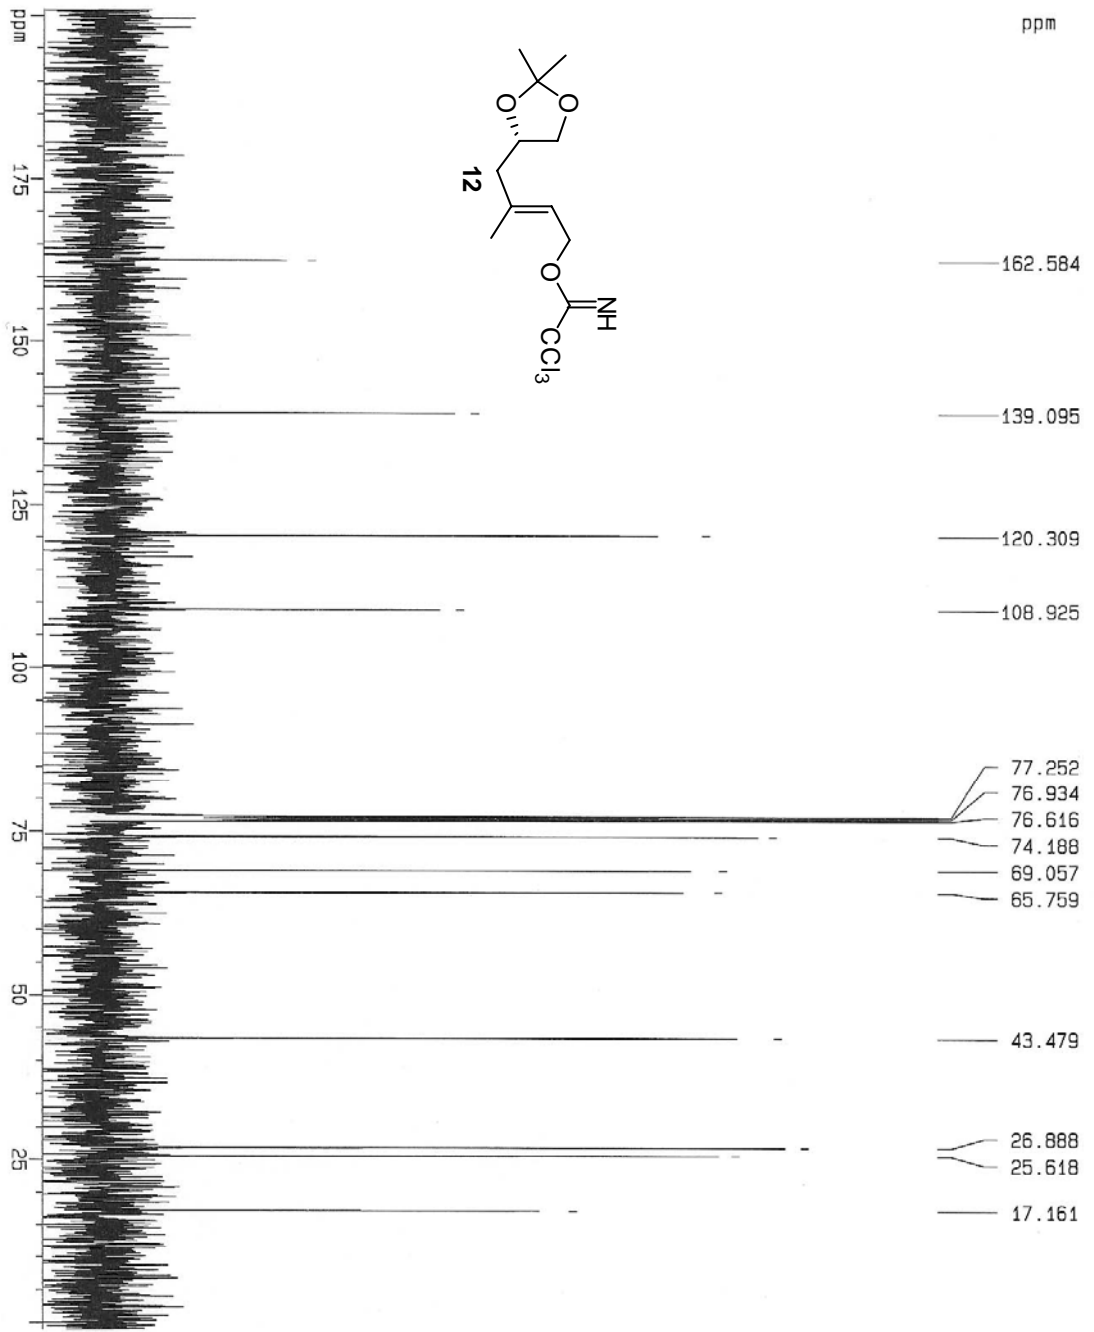

Current Data Parameters  
 NAME chx\_10\_030\_01  
 EXPNO 2  
 PROCNO 2

F2 - Acquisition Parameters  
 Date\_ 20120131  
 Time 21.17

INSTRUM spect  
 PROBHD 5 mm QNP 1H  
 PULPROG zgpg30  
 TD 32768  
 SOLVENT CDCl<sub>3</sub>  
 NS 73  
 DS 2

SMH 23909.523 Hz  
 FIDRES 0.726509 Hz  
 AQ 0.6881780 sec  
 R6 15384  
 DM 21.000 usec  
 DE 30.00 usec  
 TE 300.0 K

D12 0.0000200 sec  
 DL6 21.00 dB  
 D1 2.00000000 sec  
 CPDPRG3 waltz16  
 P31 76.00 usec  
 D11 0.0300000 sec  
 DL5 18.00 dB  
 P1 8.50 usec

SF01 100.6330000 MHz  
 NUCLEUS <sup>13</sup>C

F2 - Processing parameters  
 SI 16384  
 SF 100.6220720 MHz  
 MDN EM  
 SSB 0  
 LB 3.00 Hz  
 GB 0  
 PC 1.00

1D NMR plot parameters  
 CX 20.00 cm  
 F1P 201.000 ppm  
 F1 20225.04 Hz  
 F2P -1.000 ppm  
 F2 -100.62 Hz  
 PPGCM 10.10000 ppm/cm  
 HZCM 1016.28250 Hz/cm

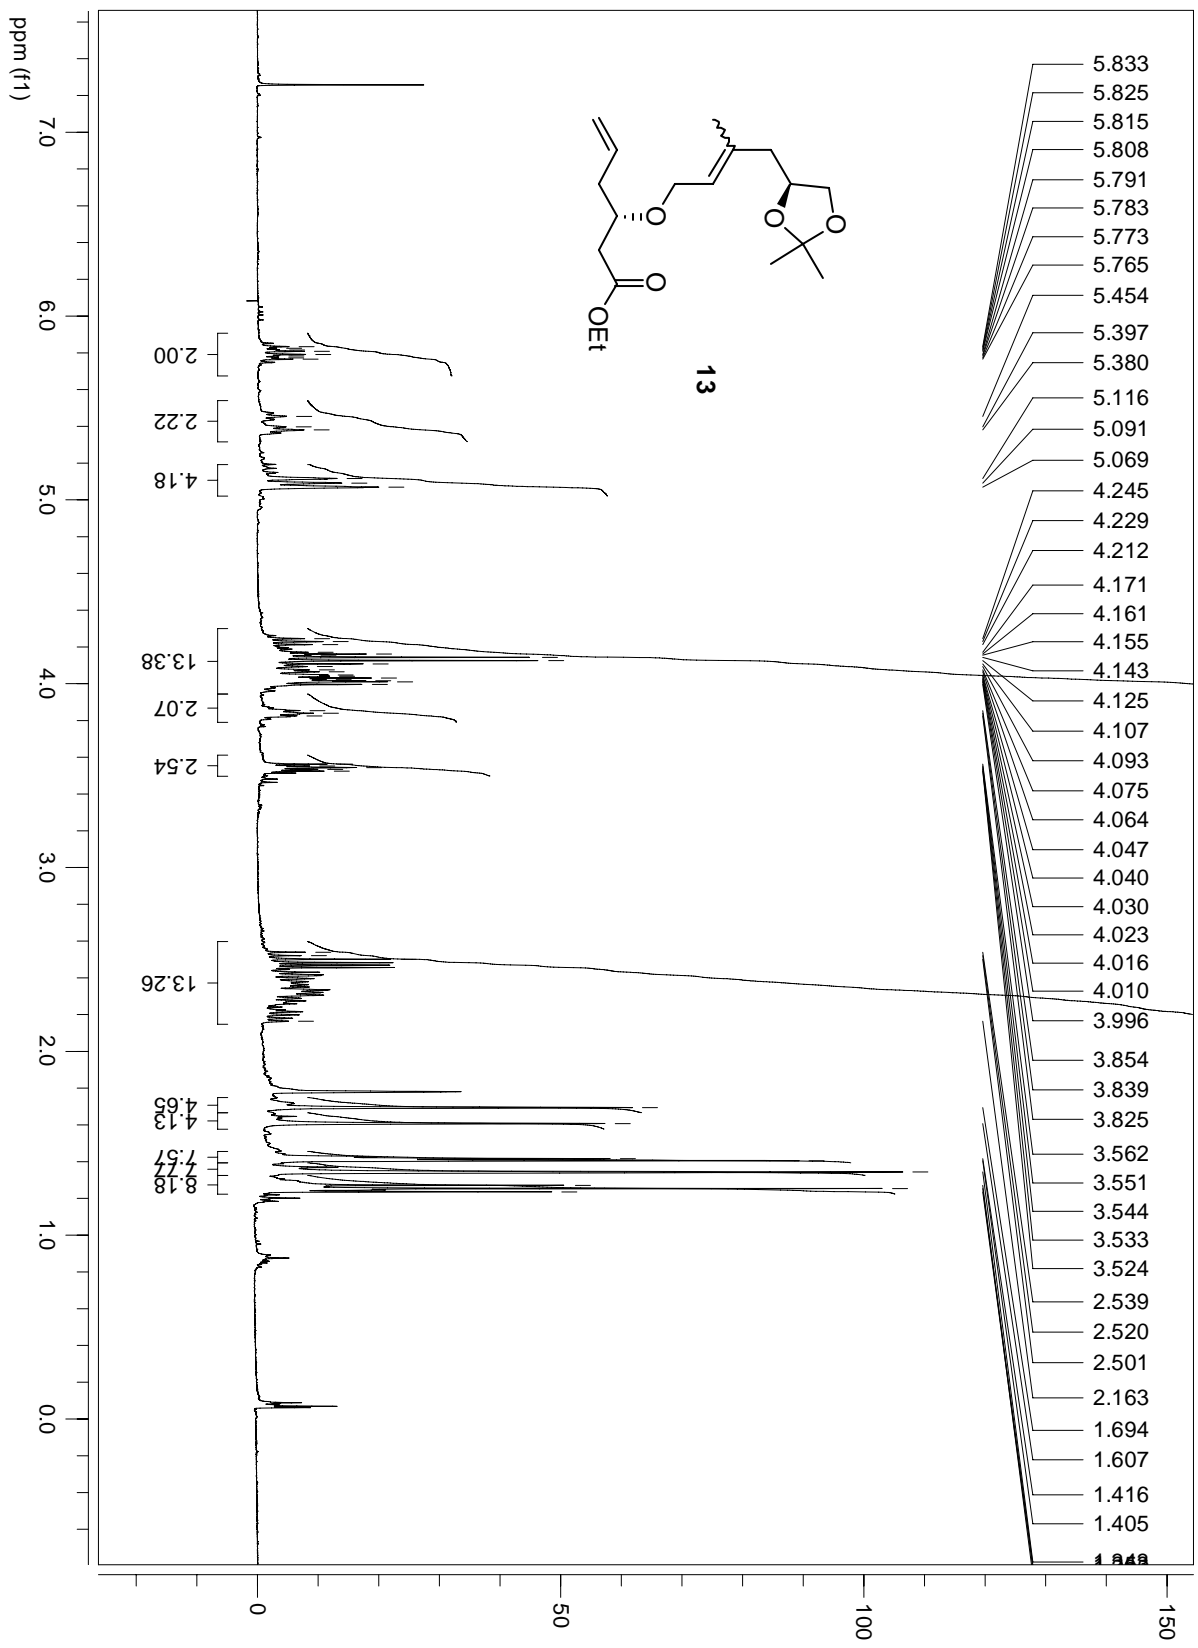

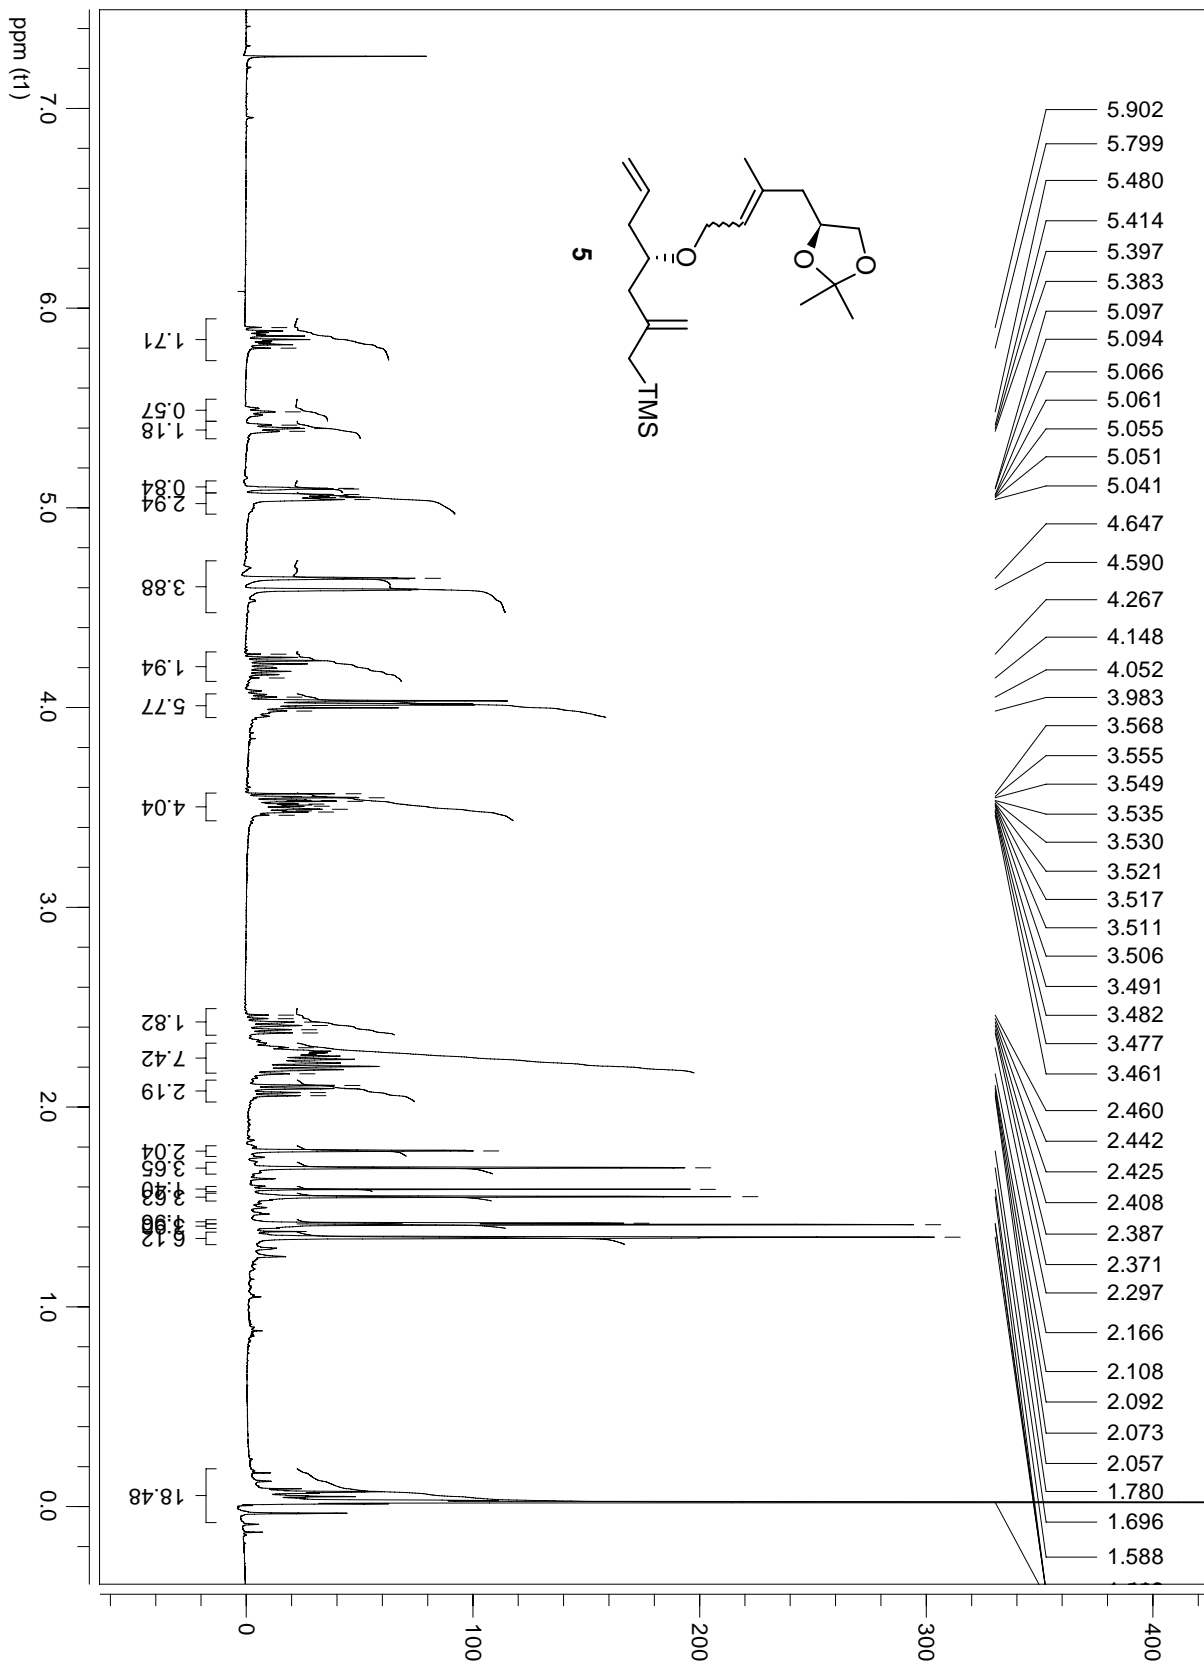

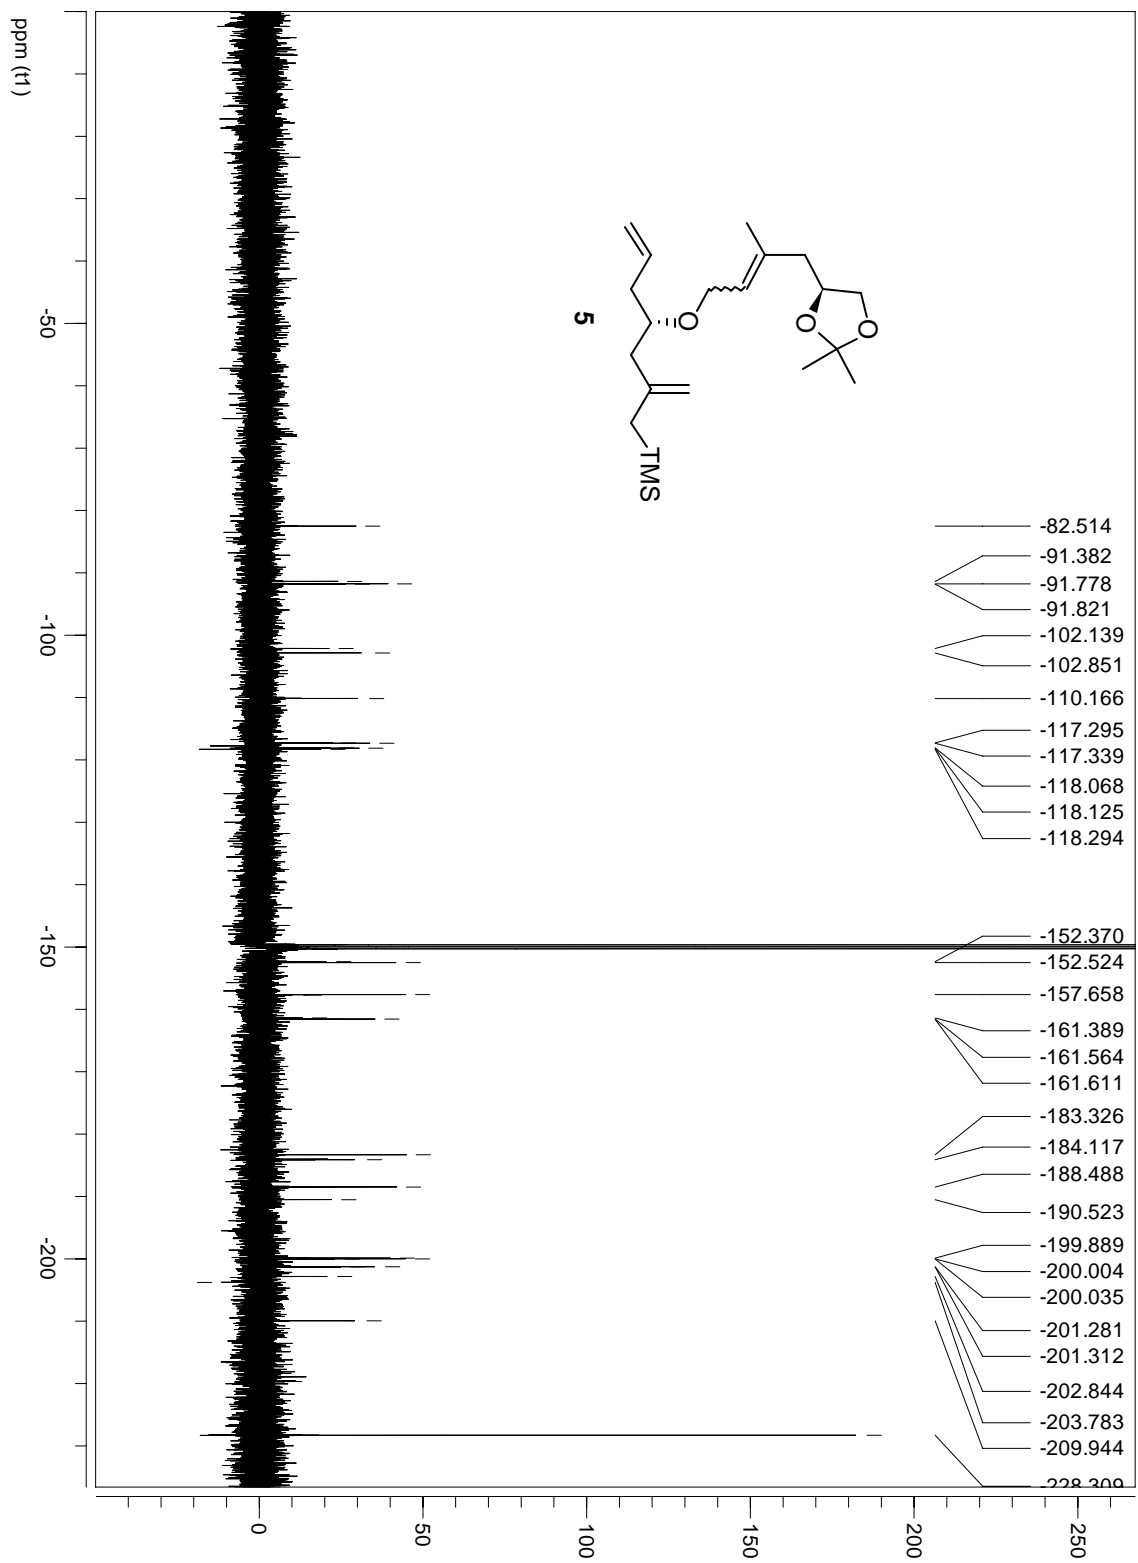



chx\_05\_082\_02\_c

Data Collected on: jnova300-1-jnova41freq  
Archive directory: /mnt/dz/p/nmr/f/harwood/vnmrSYS/data  
Sample directory:  
File: chx\_05\_082\_02\_c

Pulse Sequence: szpu1  
Solvent: CDCl3

Relax: delay 2.000 sec  
Pulse 33.8 degree  
Acq: time 0.468 sec  
Width 17497.8 Hz  
800 Repetitions  
OBSERVE C13, 75.4249826 MHz  
DECUPLE H1, 299.9613603 MHz  
Power 40 dB  
Continuously on  
WALTZ-16 modulated  
DATA PROCESSING  
Line Broadening 3.0 Hz  
FT Size 32768  
Total time 19 min

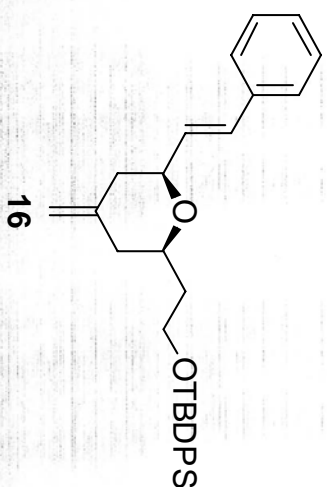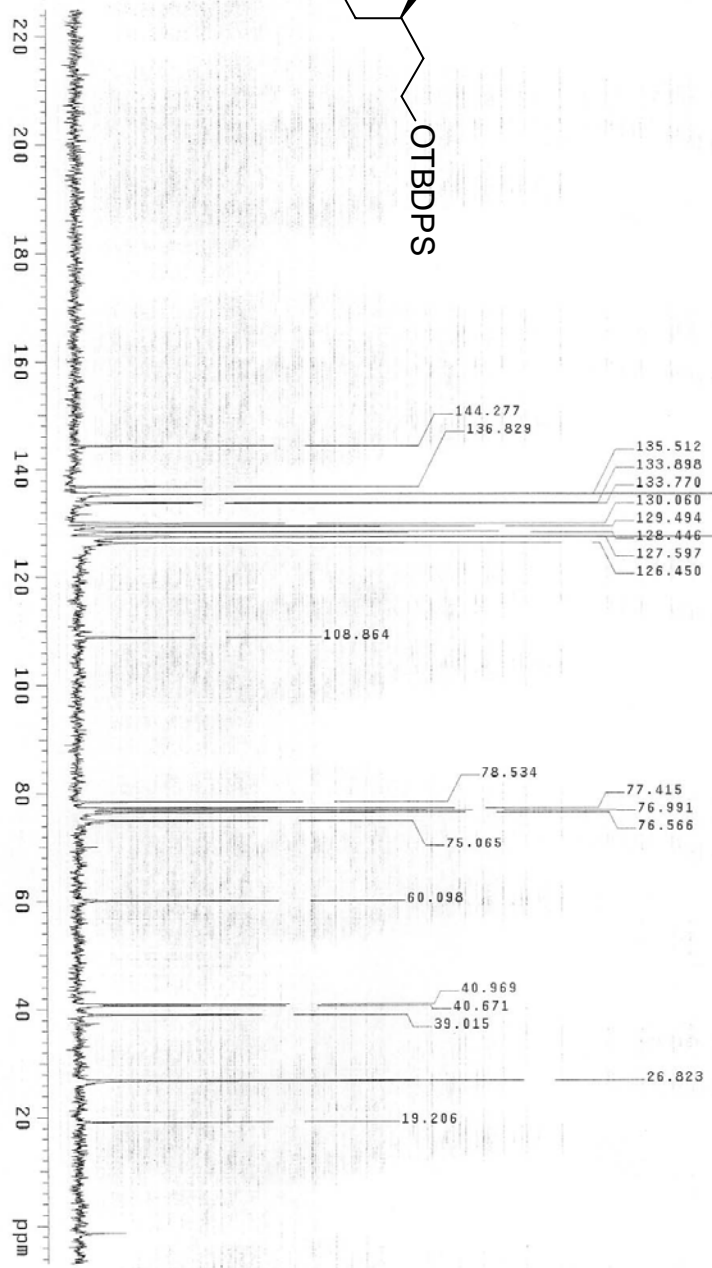

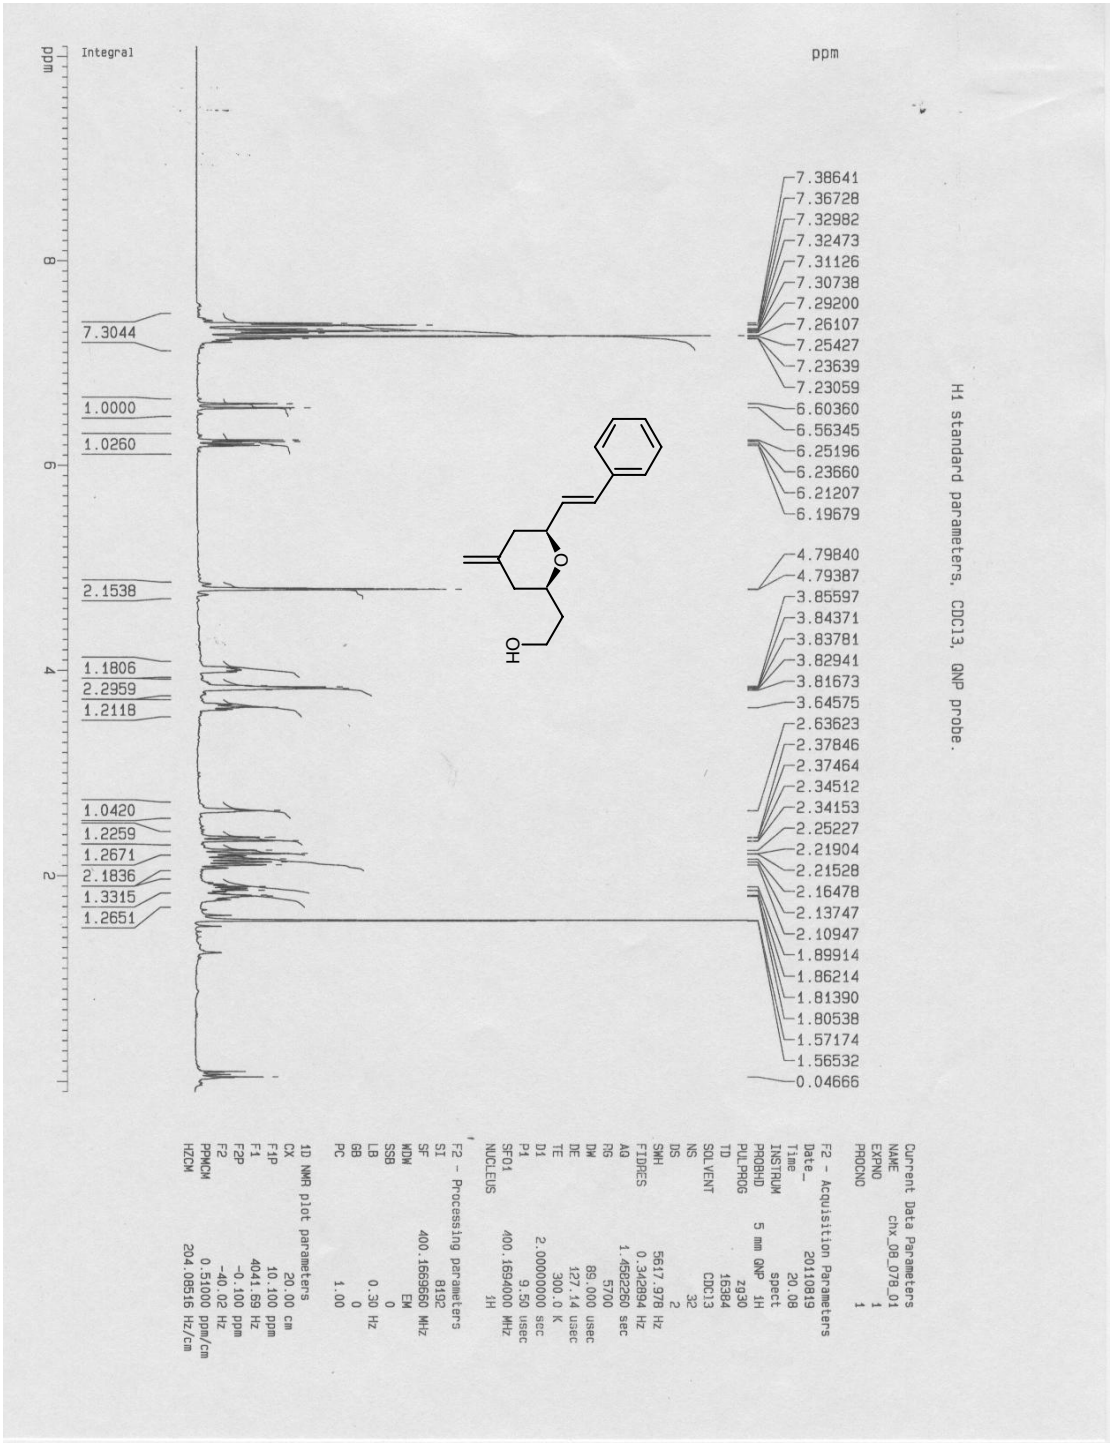

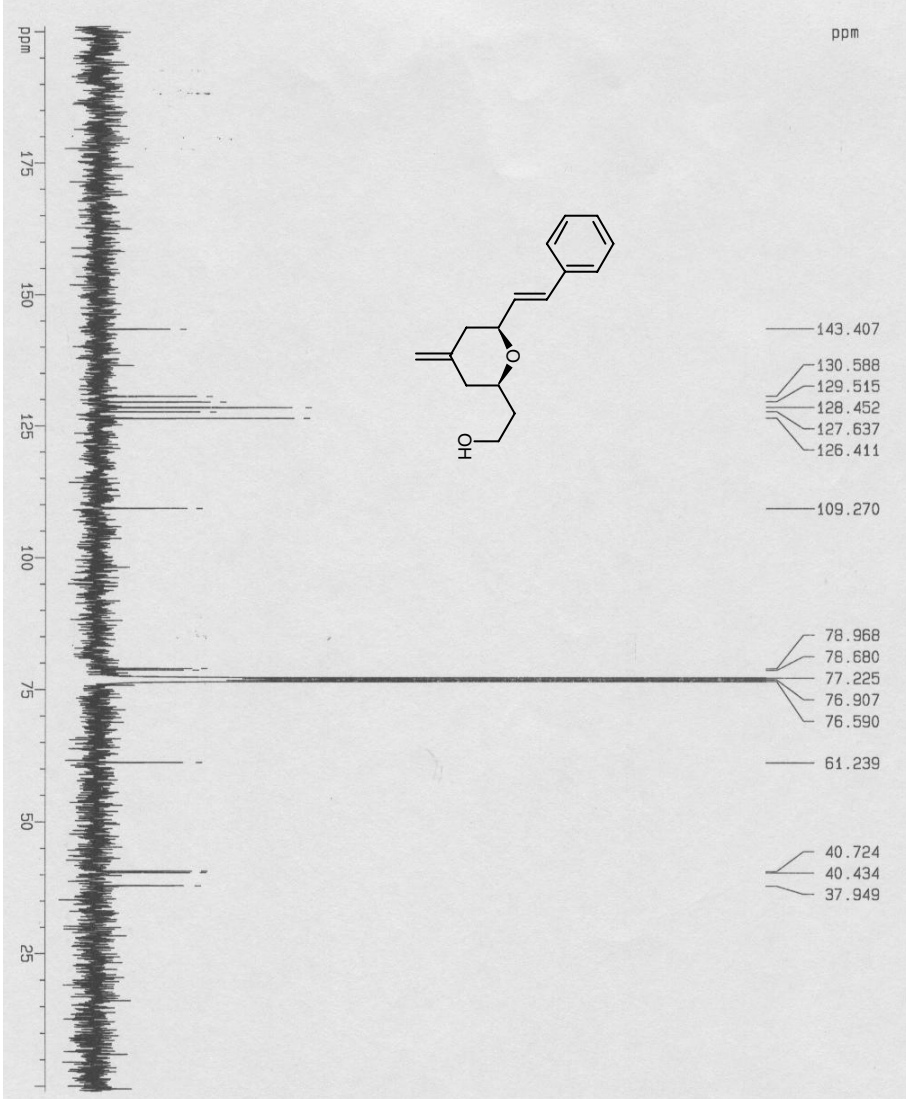

C13 standard parameters, CDCl3, QNP probe.

- 143.407
- 130.588
- 129.515
- 128.452
- 127.637
- 126.411
- 109.270
- 78.968
- 78.680
- 77.225
- 76.907
- 76.590
- 61.239
- 40.724
- 40.434
- 37.949

Current Data Parameters  
 NAME chx\_08\_078\_01  
 EXPNO 2  
 PROCNO 2

F2 - Acquisition Parameters  
 Date\_ 20110819  
 Time 20.11  
 INSTRUM spect  
 PROBHD 5 mm QNP 1H  
 PULPROG zgpg30  
 TD 32768  
 SOLVENT CDCl3  
 NS 729  
 DS 2  
 SHH 2300.523 Hz  
 FIDRES 0.726609 Hz  
 AQ 0.6981790 sec  
 RG 65384  
 DM 21.000 usec  
 DE 30.00 usec  
 TE 300.0 K  
 D12 0.0000200 sec  
 DL6 21.00 dB  
 D1 2.000000000 sec  
 CPDPRG waltz16  
 p231 76.00 usec  
 d11 0.0300000 sec  
 DL5 18.00 dB  
 P1 8.60 usec  
 SFQ1 100.6330000 MHz  
 NUCLEUS 13C

F2 - Processing parameters  
 S1 16384  
 SF 100.6220720 MHz  
 MDN EM  
 SSB 0  
 LB 3.00 Hz  
 GB 0  
 PC 1.00

1D NMR plot parameters  
 CX 20.00 cm  
 F1P 201.000 ppm  
 F1 20226.04 Hz  
 F2P -1.000 ppm  
 F2 -100.63 Hz  
 PPMCM 10 10000 ppm/cm  
 HZCM 1016.28290 Hz/cm



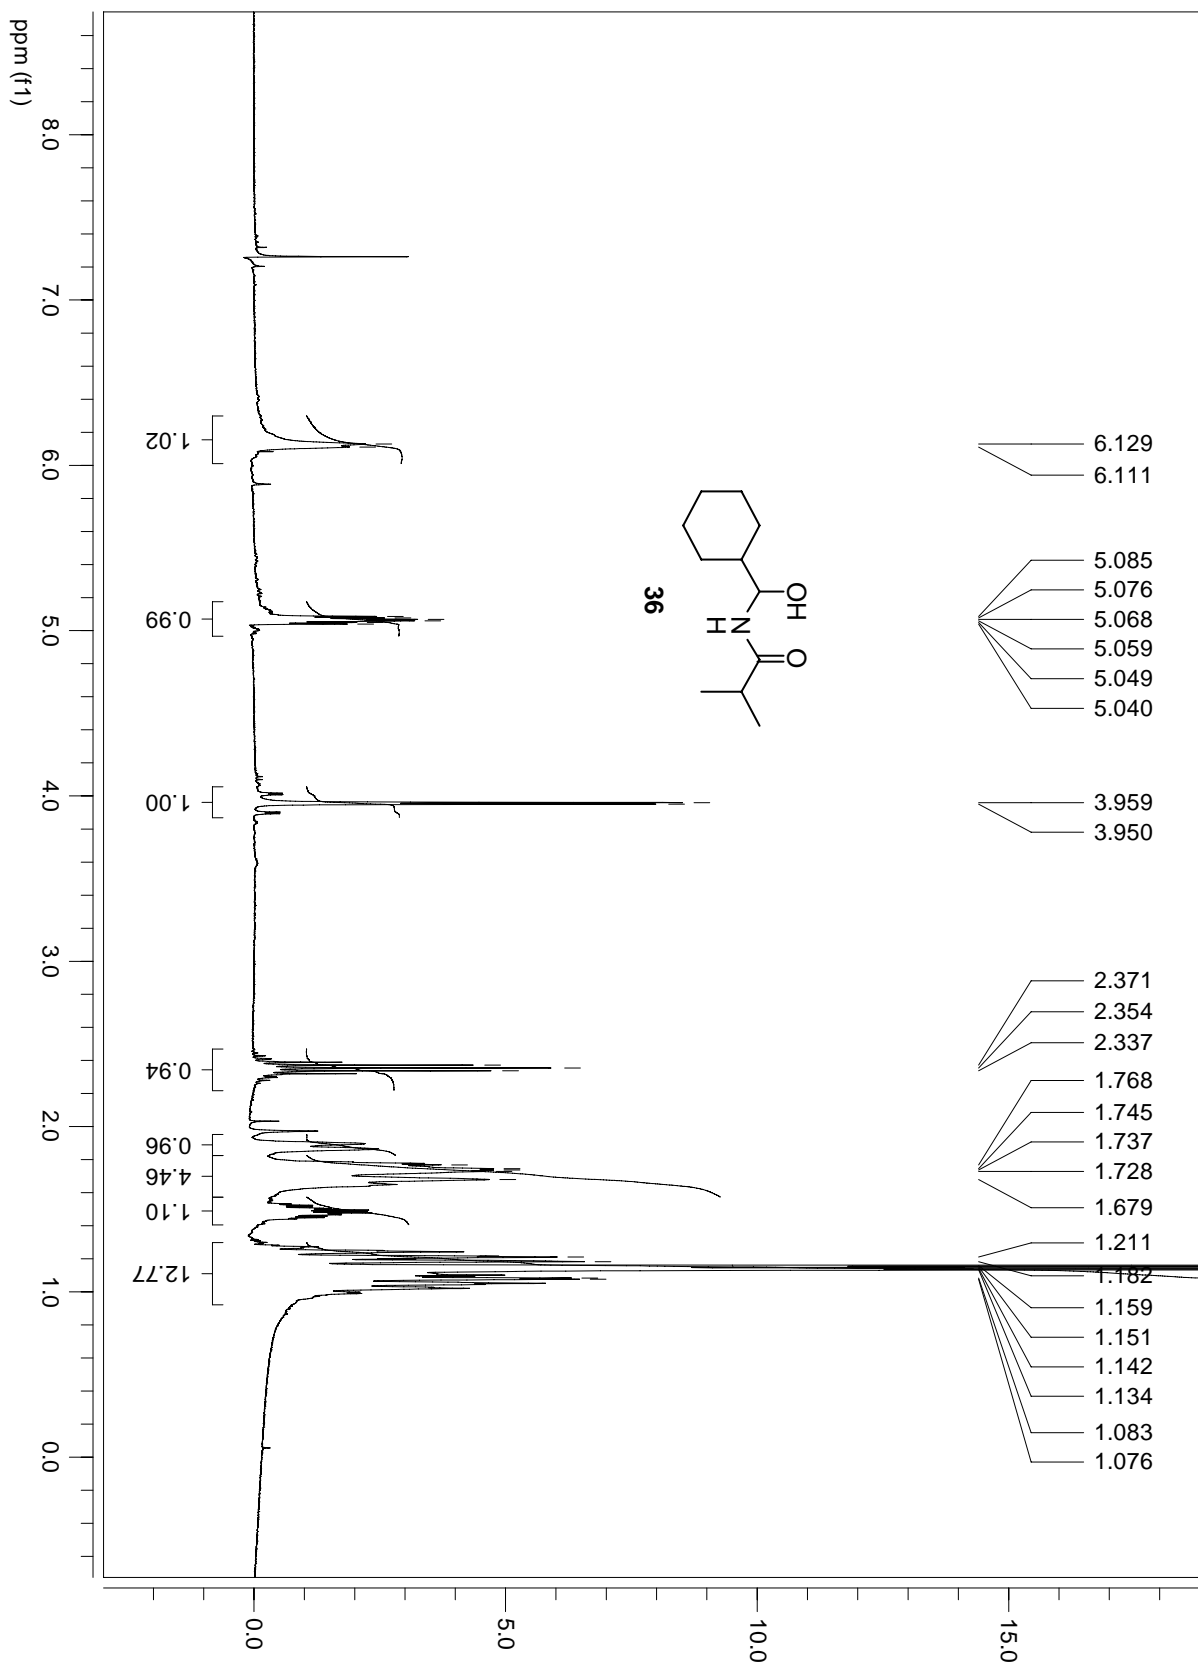

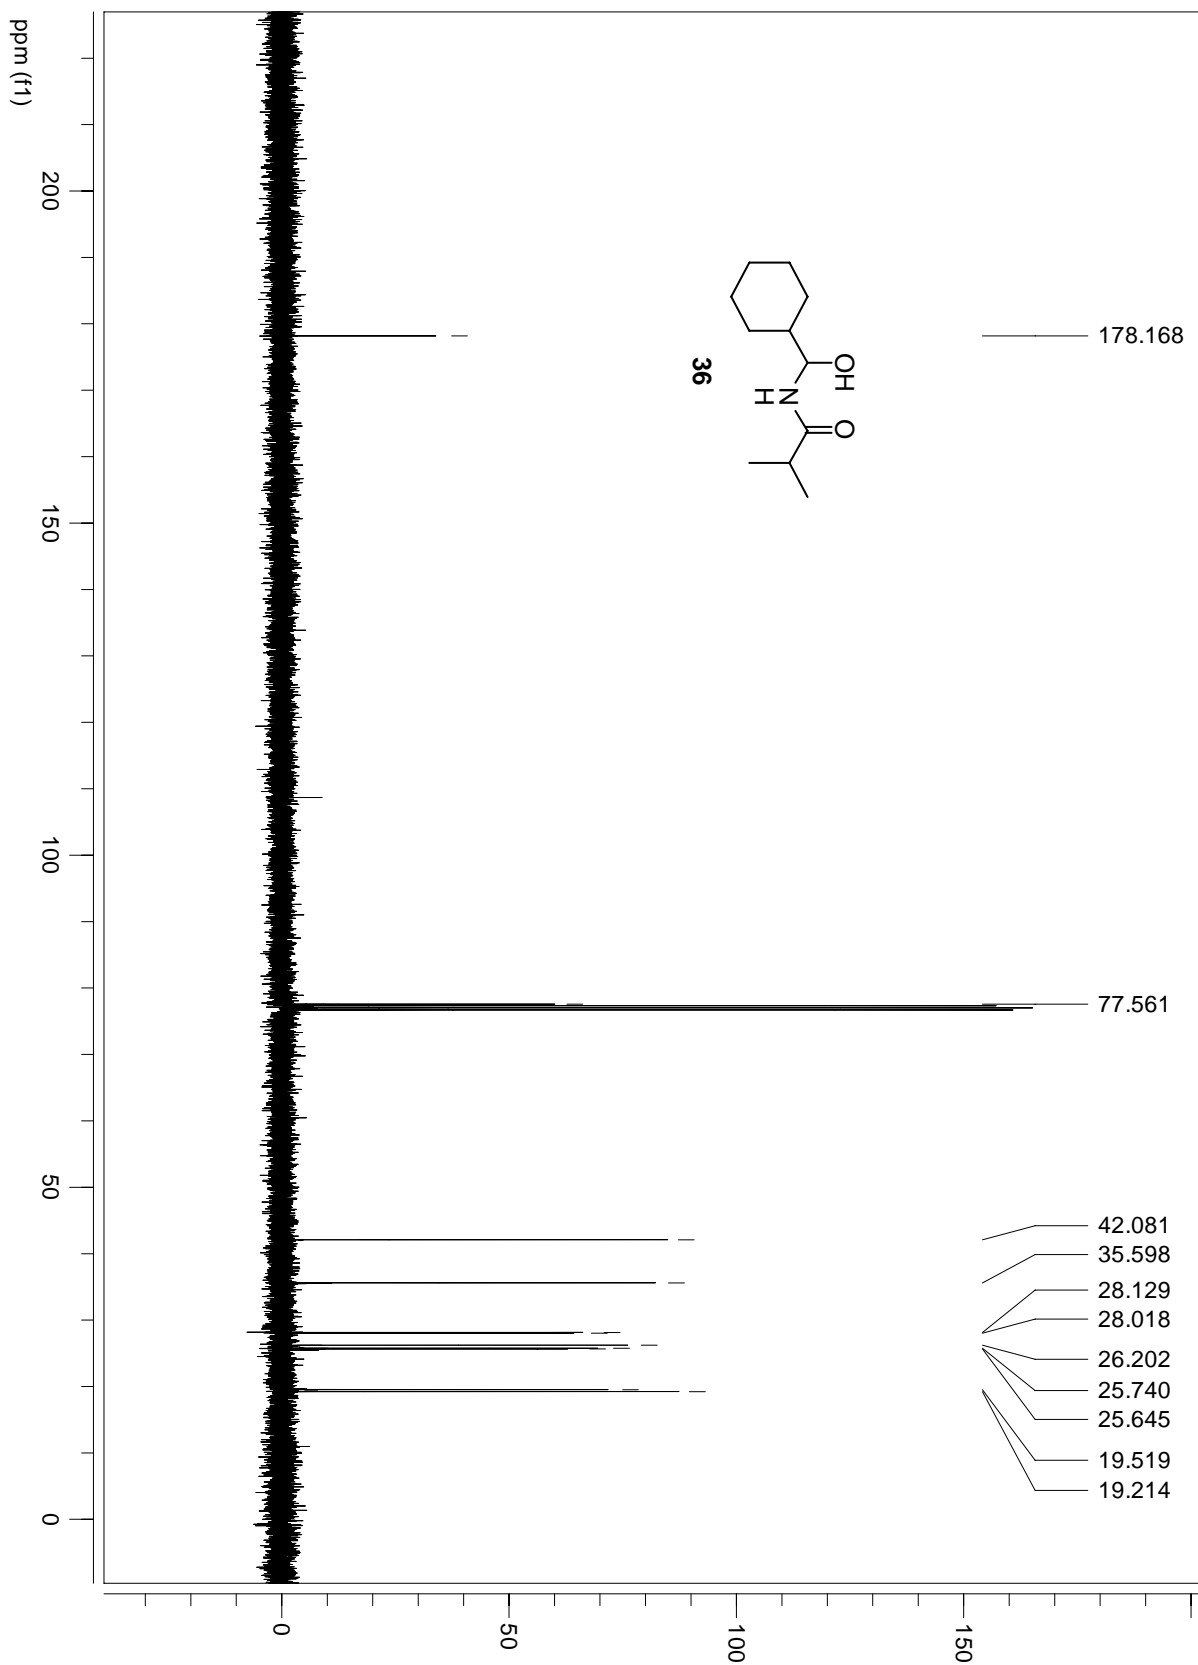

H1 standard parameters, CDCl3, GNP probe.

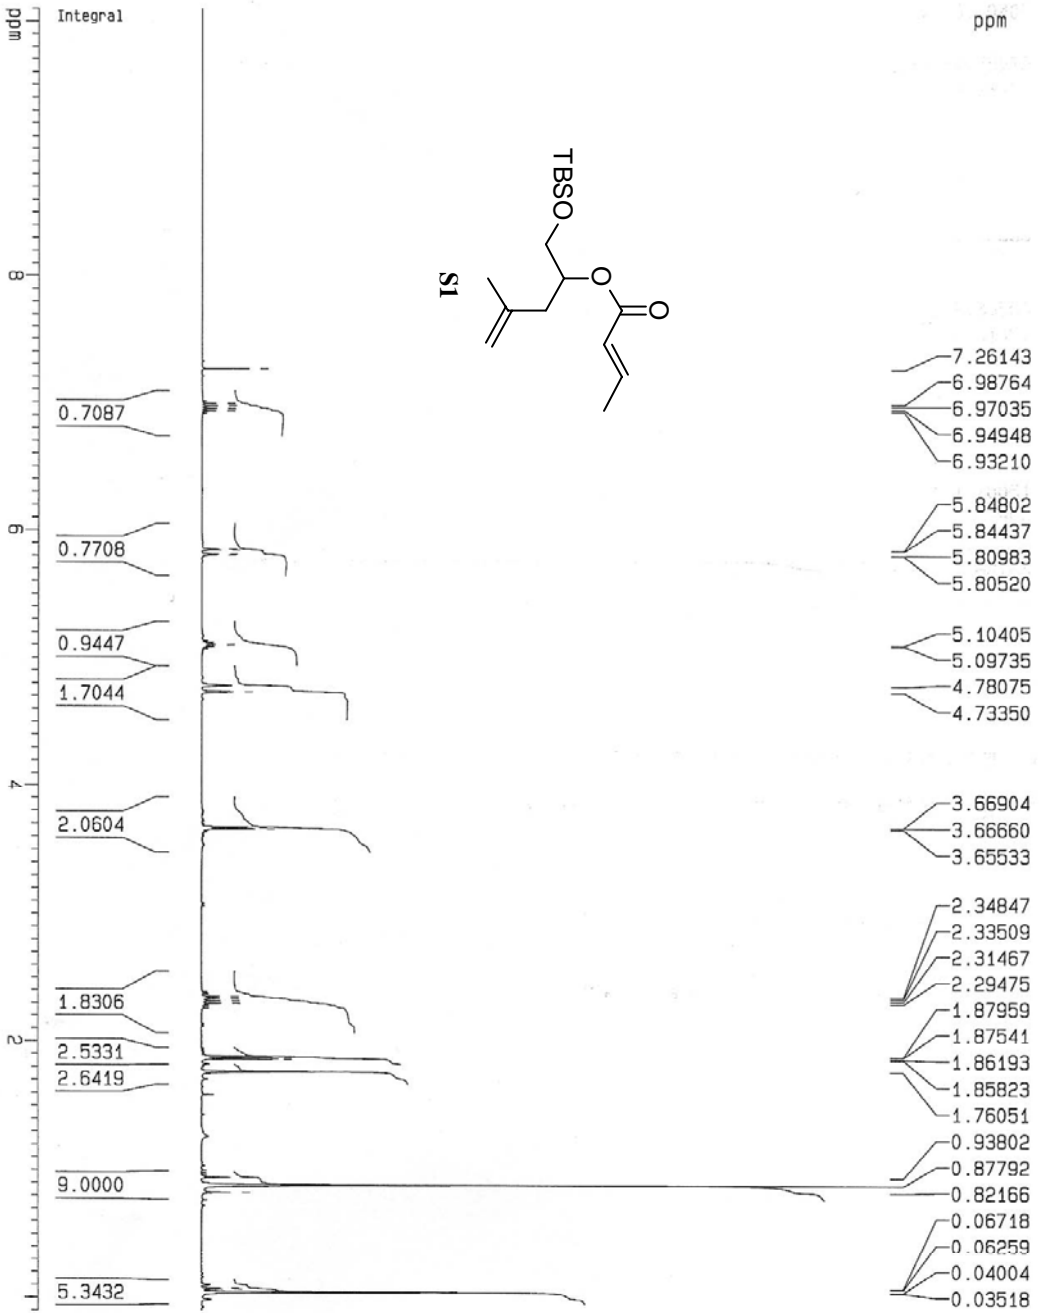

```

Current Data Parameters
NAME      c1x_10_096_04
EXPNO     1
PROCNO    1
F2 - Acquisition Parameters
Date_     20120210
Time      17.34
INSTRUM   spect
PROBHD    5 mm GNP 1H
PULPROG   zg30
TD         65536
SOLVENT   CDCl3
NS         24
DS         2
SMB       5617.978 Hz
FIDRES    0.342894 Hz
AQ         1.4592260 sec
RG         1024
DM         89.000 usec
DE         127.14 usec
TE         300.0 K
D1         2.00000000 sec
P1         9.50 usec
SF01      400.1694000 MHz
NUCLEUS   1H
F2 - Processing parameters
SI         8192
SF         400.1699660 MHz
MDM        EM
SSB        0
LB         0.30 Hz
GB         0
PC         1.00
1D NMR plot parameters
CX         20.00 cm
F1P        10.100 ppm
F1         4041.69 Hz
F2P        -0.100 ppm
F2         -40.02 Hz
P1MCMW    0.51000 ppm/cm
HZCM      204.08516 Hz/cm

```

C13 standard parameters, CDCl3, QNP probe.

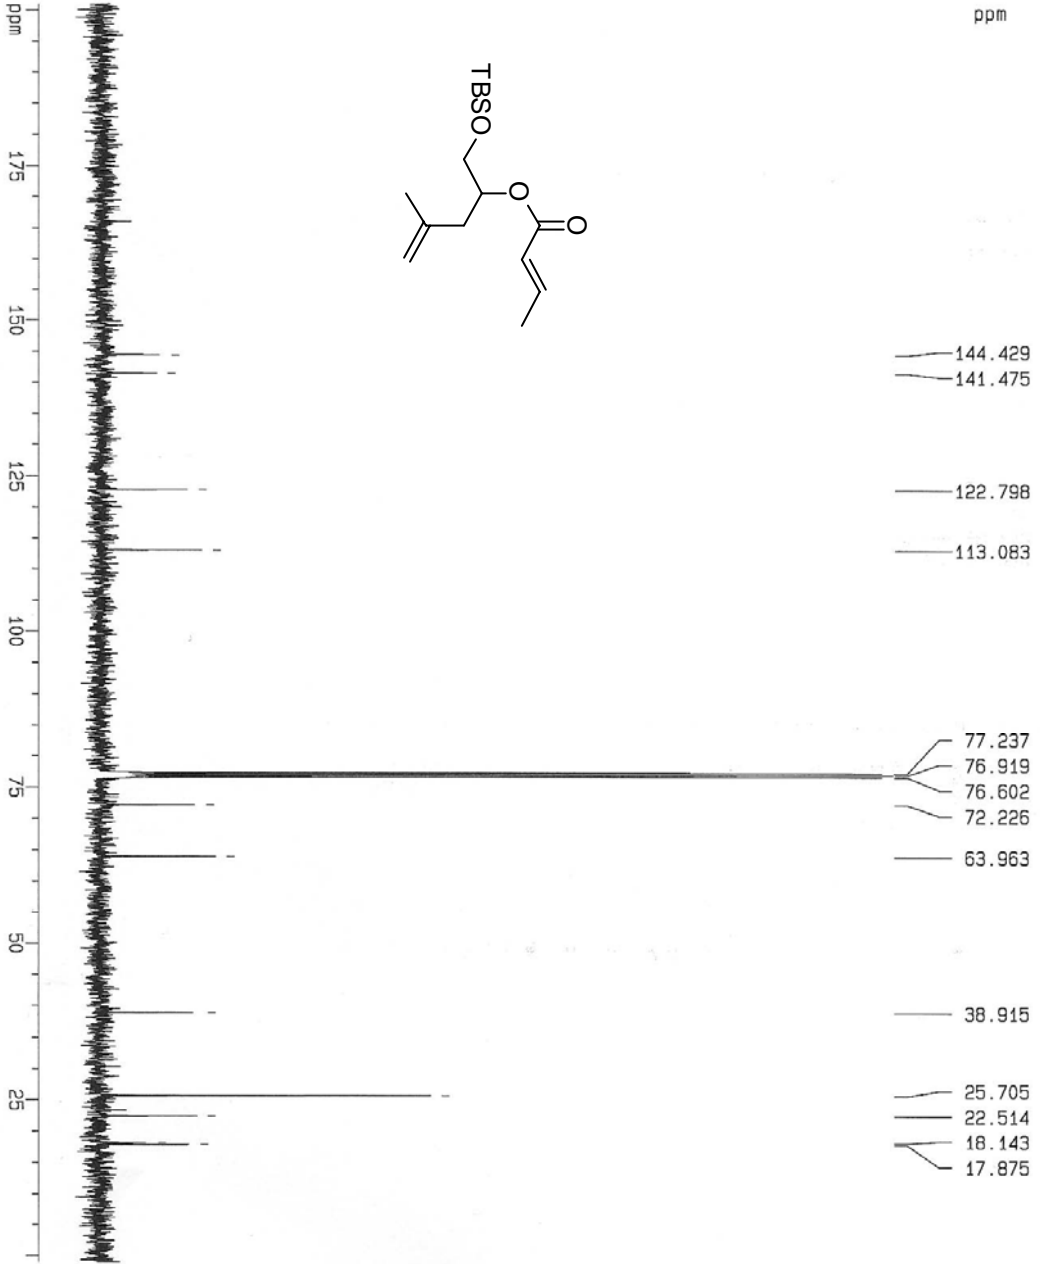

Current Data Parameters  
 NAME chx\_10\_036\_04  
 EXPNO 2  
 PROCNO 2

F2 - Acquisition Parameters  
 Date\_ 20120210  
 Time 17.36  
 INSTRUM spect  
 PROBHD 5 mm QNP 1H  
 PULPROG zgpg30  
 TD 32768  
 SOLVENT CDCl3  
 NS 129  
 DS 2  
 SWH 23809.523 Hz  
 FIDRES 0.726609 Hz  
 AQ 0.6681780 sec  
 RG 16384  
 DM 21.000 usec  
 DE 30.00 usec  
 TE 300.0 K  
 D12 0.0000200 sec  
 DLS 21.00 dB  
 D1 2.00000000 sec  
 CPDPRG waltz16  
 P31 76.00 usec  
 D11 0.0300000 sec  
 DLS 18.00 dB  
 P1 8.60 usec  
 SFO1 100.6330000 MHz  
 NUCLEUS 13C

F2 - Processing parameters  
 SI 16384  
 SF 100.6220720 MHz  
 MDM EM  
 SSB 0  
 LB 3.00 Hz  
 GB 0  
 PC 1.00

1D NMR plot parameters  
 CX 20.00 cm  
 FIP 201.000 ppm  
 F1 20225.04 Hz  
 F2P -1.000 ppm  
 F2 -100.62 Hz  
 PPMCM 10.10000 ppm/cm  
 HZCM 1016.28290 Hz/cm

H1 standard parameters, CDCl3, QNP probe.

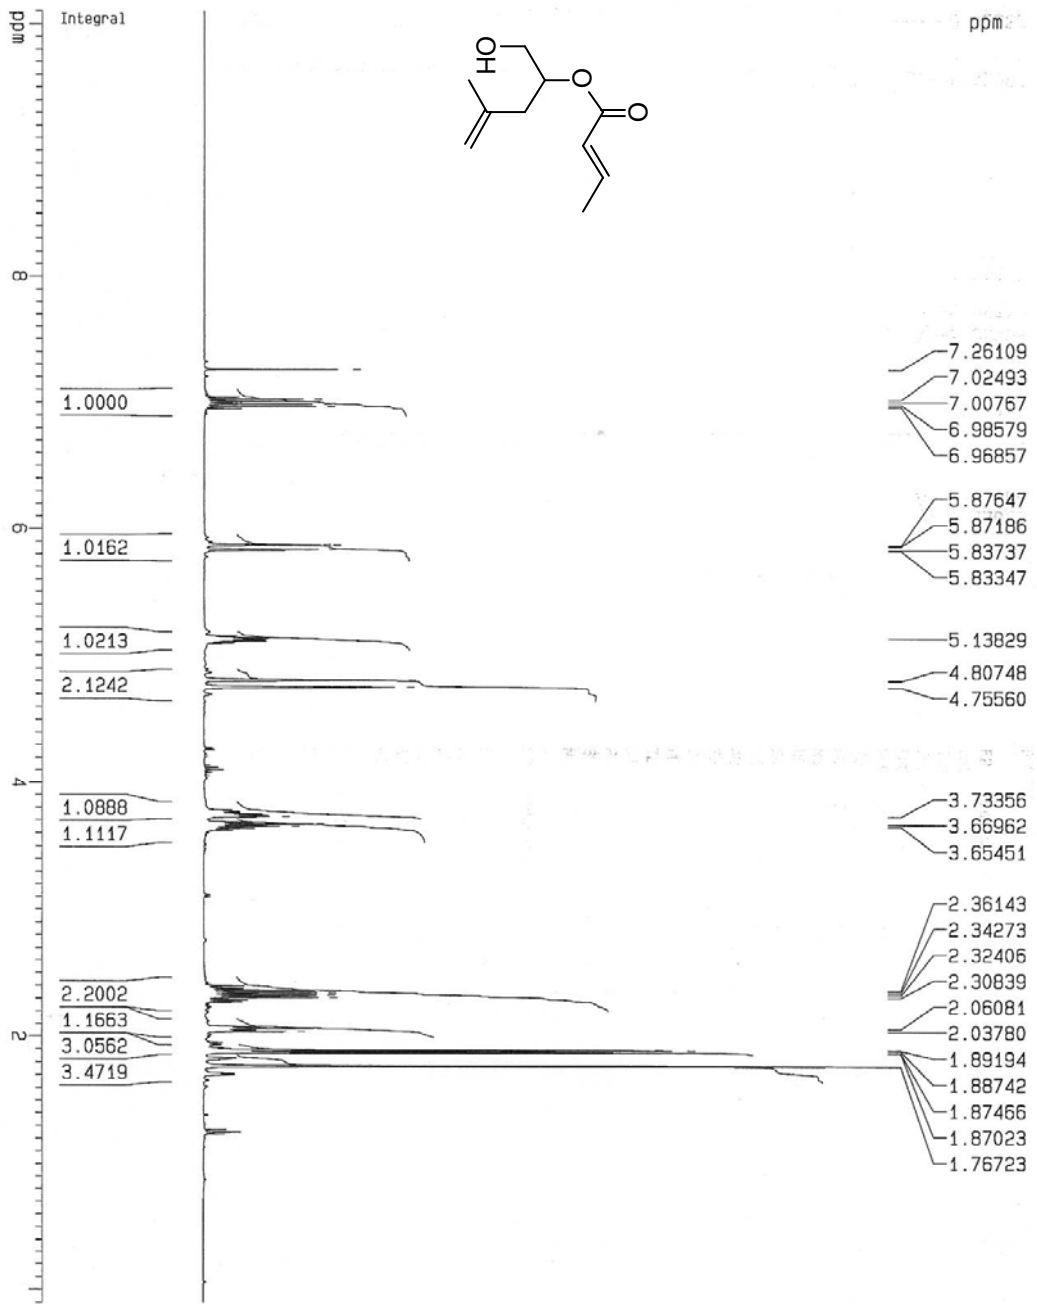

Current Data Parameters  
 NAME chx\_10\_037\_02  
 EXPNO 1  
 PROCNO 1

F2 - Acquisition Parameters  
 Date\_ 20120213  
 Time 15.05  
 INSTRUM spect  
 PROBHD 5 mm QNP 1H  
 PULPROG zg30  
 TD 16384  
 SOLVENT CDCl3  
 NS 17  
 DS 2  
 SMH 5517.978 Hz  
 FIDRES 0.342894 Hz  
 AQ 1.4582260 sec  
 RG 1430  
 DW 89.000 usec  
 DE 127.14 usec  
 TE 300.0 K  
 D1 2.00000000 sec  
 P1 9.50 usec  
 SFO1 400.169400 MHz  
 NUCLEUS 1H

F2 - Processing parameters  
 SI 8192  
 SF 400.1669660 MHz  
 WDW EM  
 SSB 0  
 LB 0.30 Hz  
 GB 0  
 PC 1.00

1D NMR plot parameters  
 CX 20.00 cm  
 F1P 10.100 ppm  
 F1 4041.69 Hz  
 F2P -0.100 ppm  
 F2 -40.02 Hz  
 PPMCKM 0 51000 ppm/cm  
 HZCKM 204.08516 Hz/cm

C13 standard parameters, CDCl3, QNP probe.

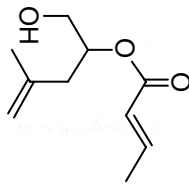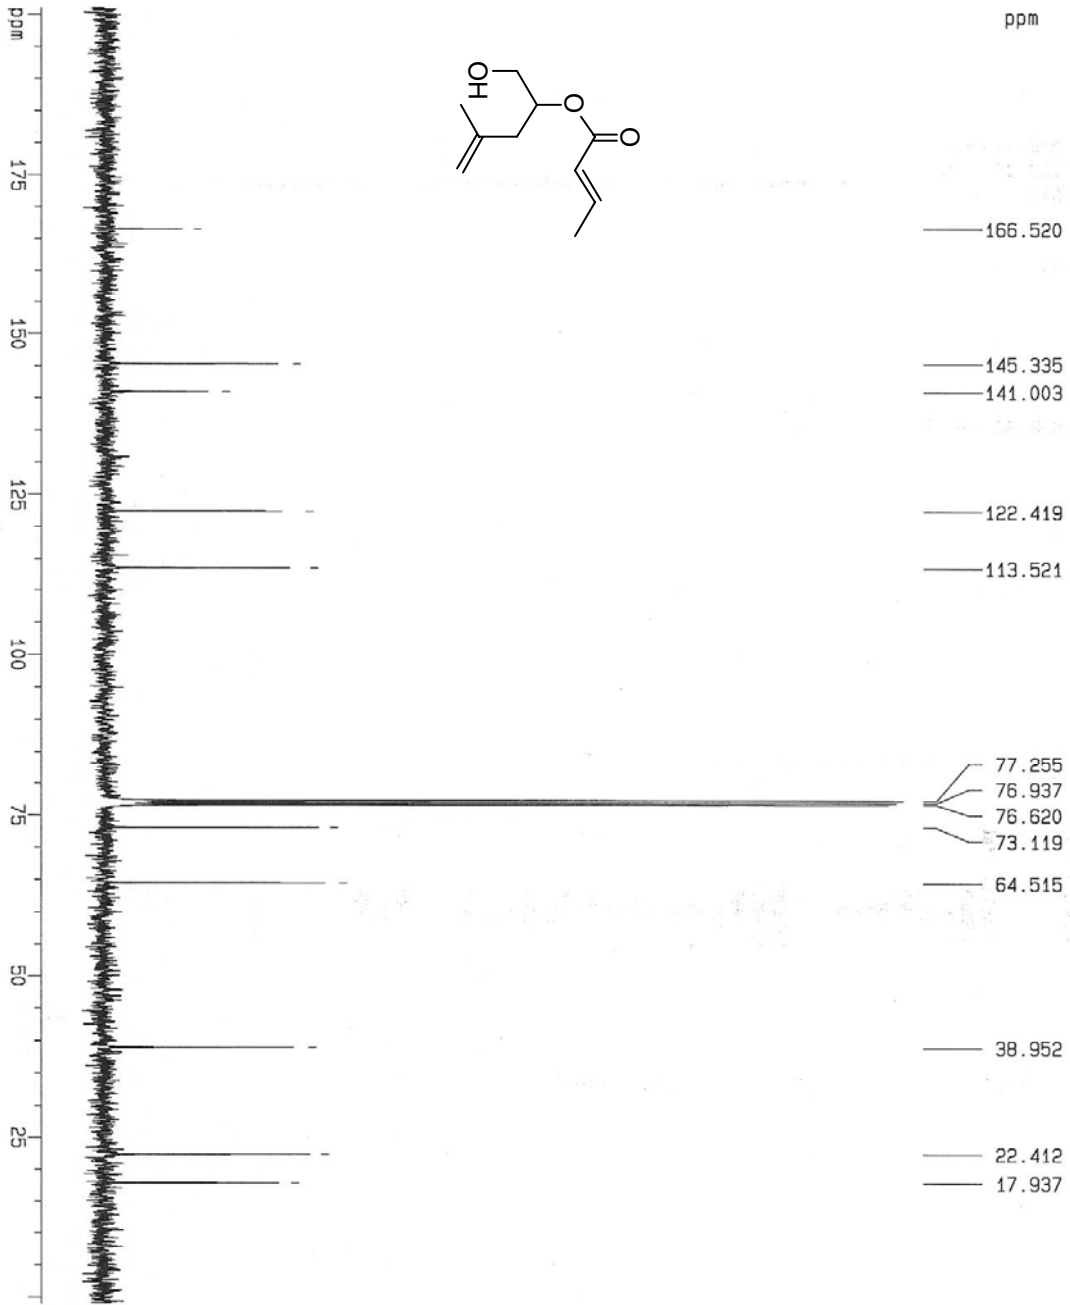

Current Data Parameters  
 NAME chx\_10\_037\_02  
 EXPNO 2  
 PROCNO 2

F2 - Acquisition Parameters  
 Date\_ 20120213  
 Time 15.08

INSTRUM spect  
 PROBHD 5 mm QNP 1H  
 PULPROG zgpg30  
 TD 32768  
 SOLVENT CDCl3  
 NS 162  
 DS 2

SWH 23809.523 Hz  
 FIDRES 0.726509 Hz  
 AQ 0.6981780 sec  
 RG 16384

DM 21.000 usec  
 DE 30.00 usec  
 TE 300.0 K  
 D12 0.0000200 sec  
 D16 21.00 dB

D1 2.00000000 sec  
 CPDPRG waltz16  
 P31 75.00 usec  
 D11 0.0300000 sec  
 DL5 18.00 dB

P1 8.60 usec  
 SF01 100.6330000 MHz  
 NUCLEUS 13C

F2 - Processing parameters  
 SI 16384  
 SF 100.6220720 MHz  
 MDW EM

SSB 0  
 LB 3.00 Hz  
 GB 0  
 PC 1.00

1D NMR plot parameters  
 CX 20.00 cm  
 F1P 201.000 ppm  
 F1 20225.04 Hz  
 F2P -1.000 ppm  
 F2 -100.62 Hz

PPMKM 10.10000 ppm/cm  
 HZCM 1016.28290 Hz/cm

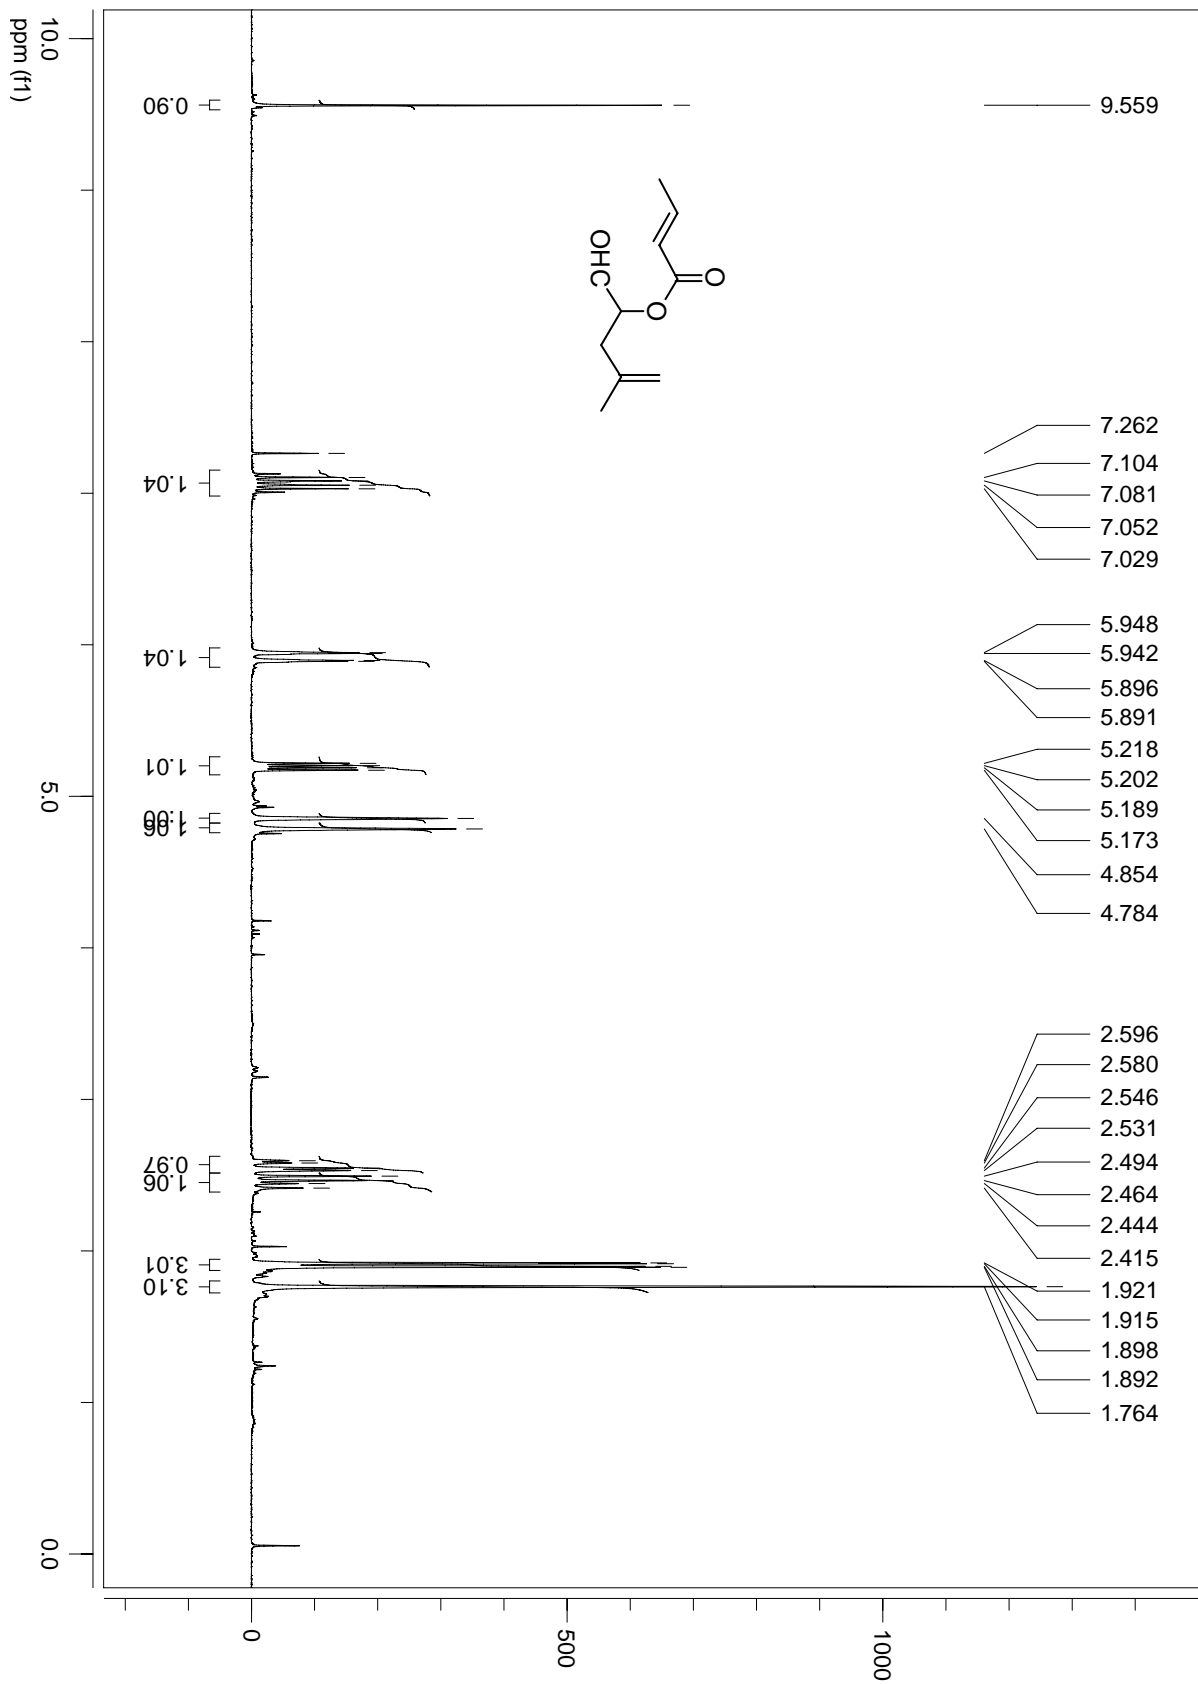

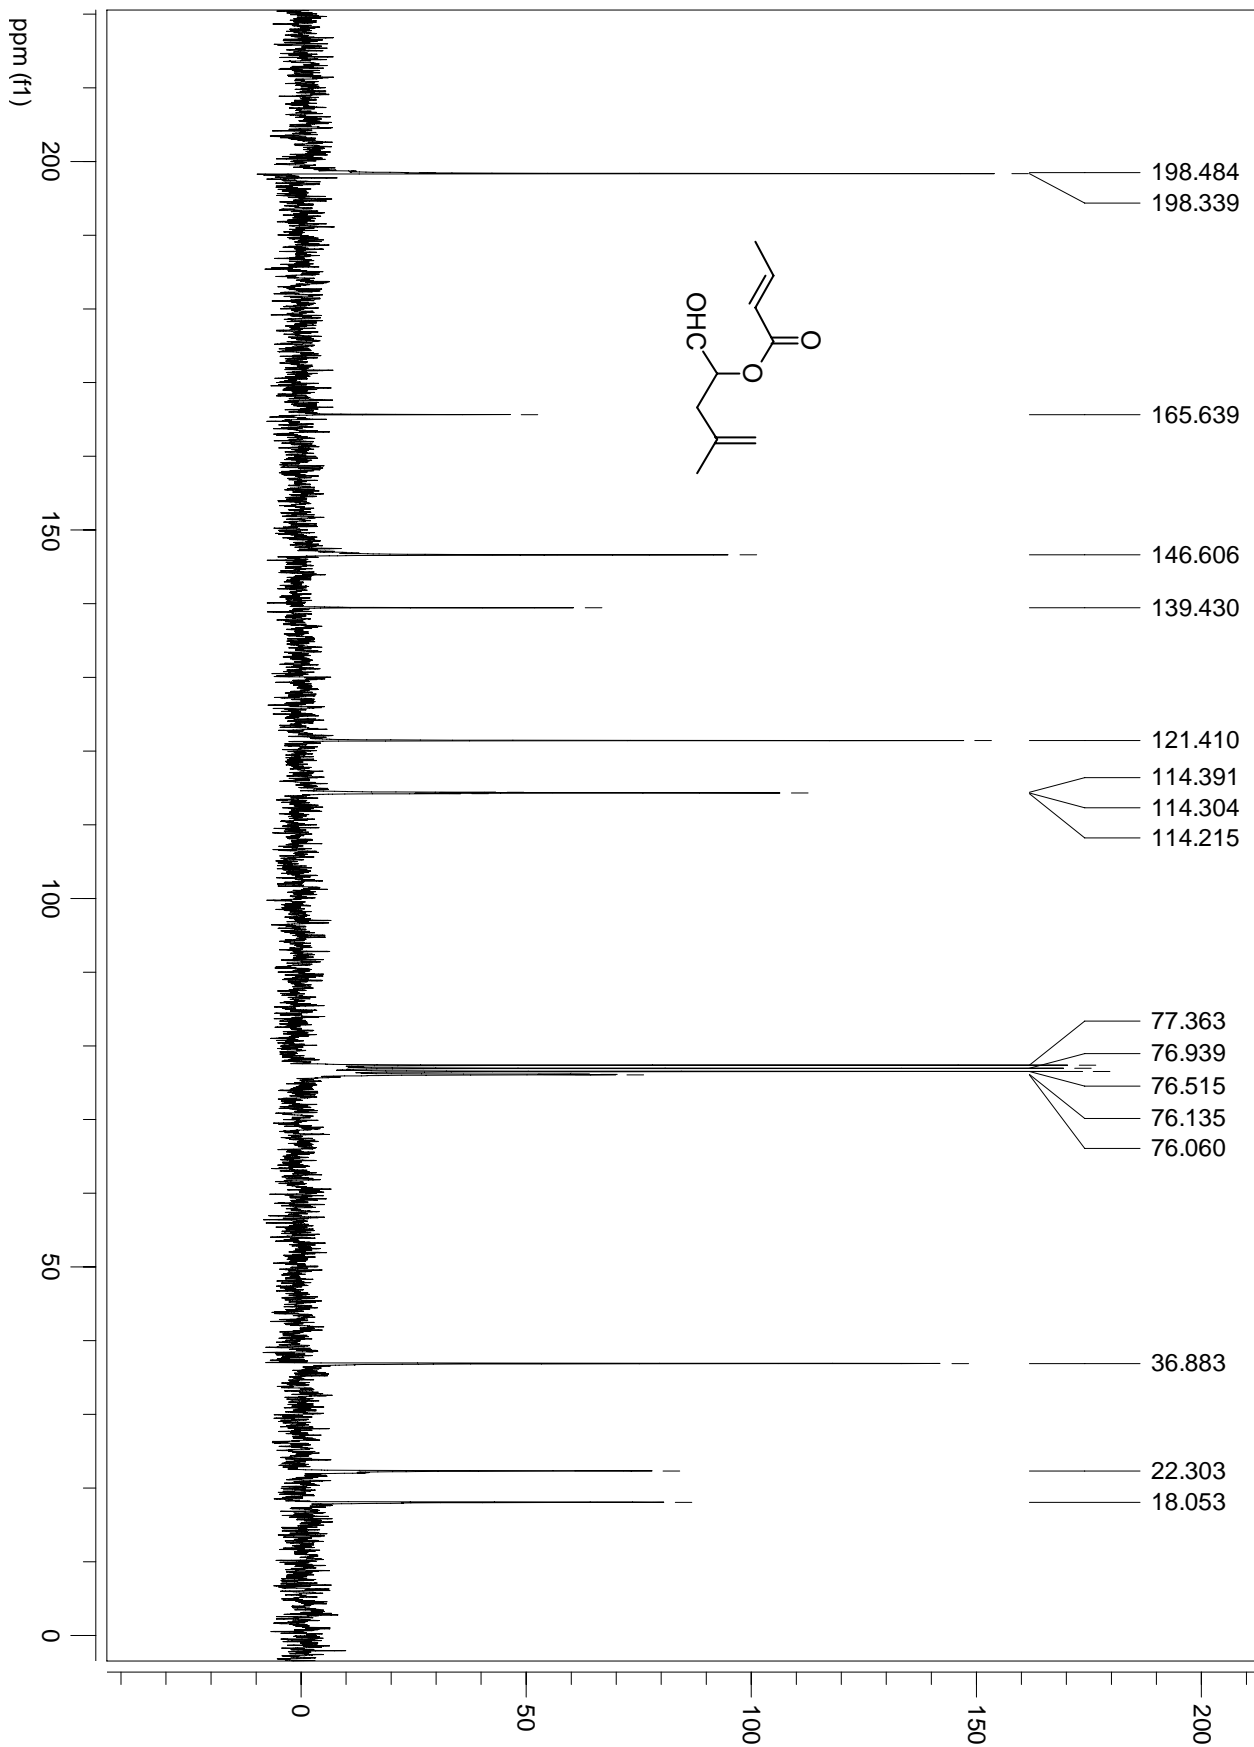



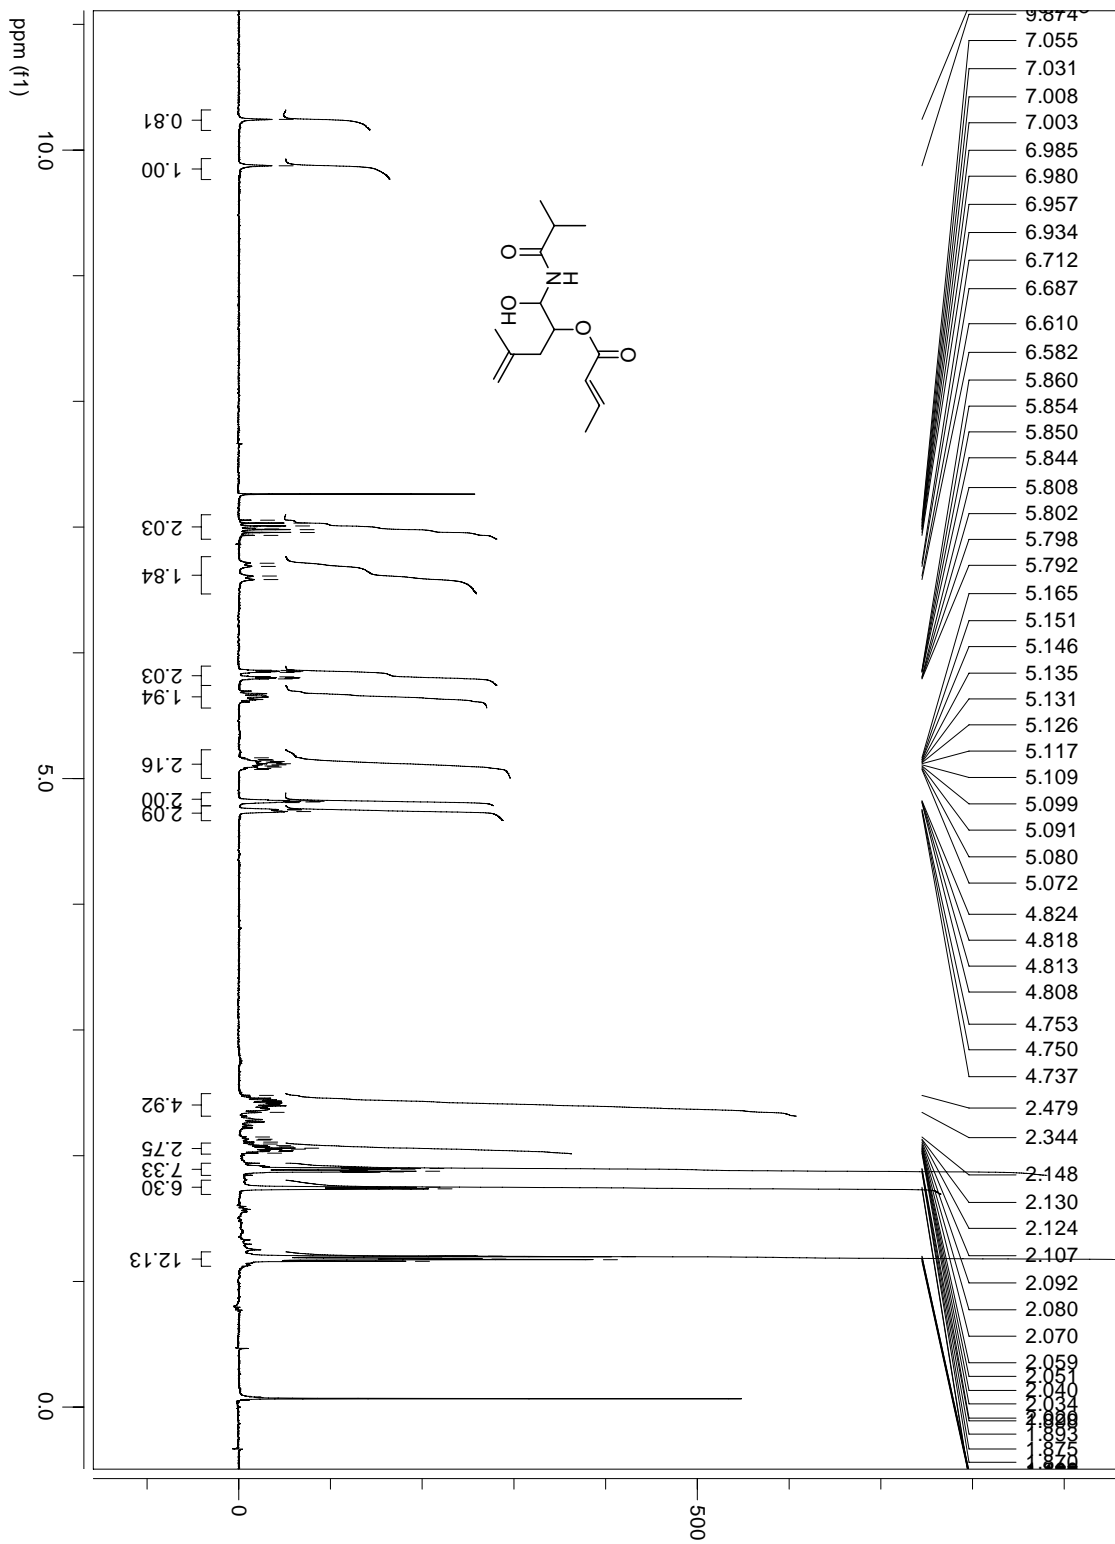

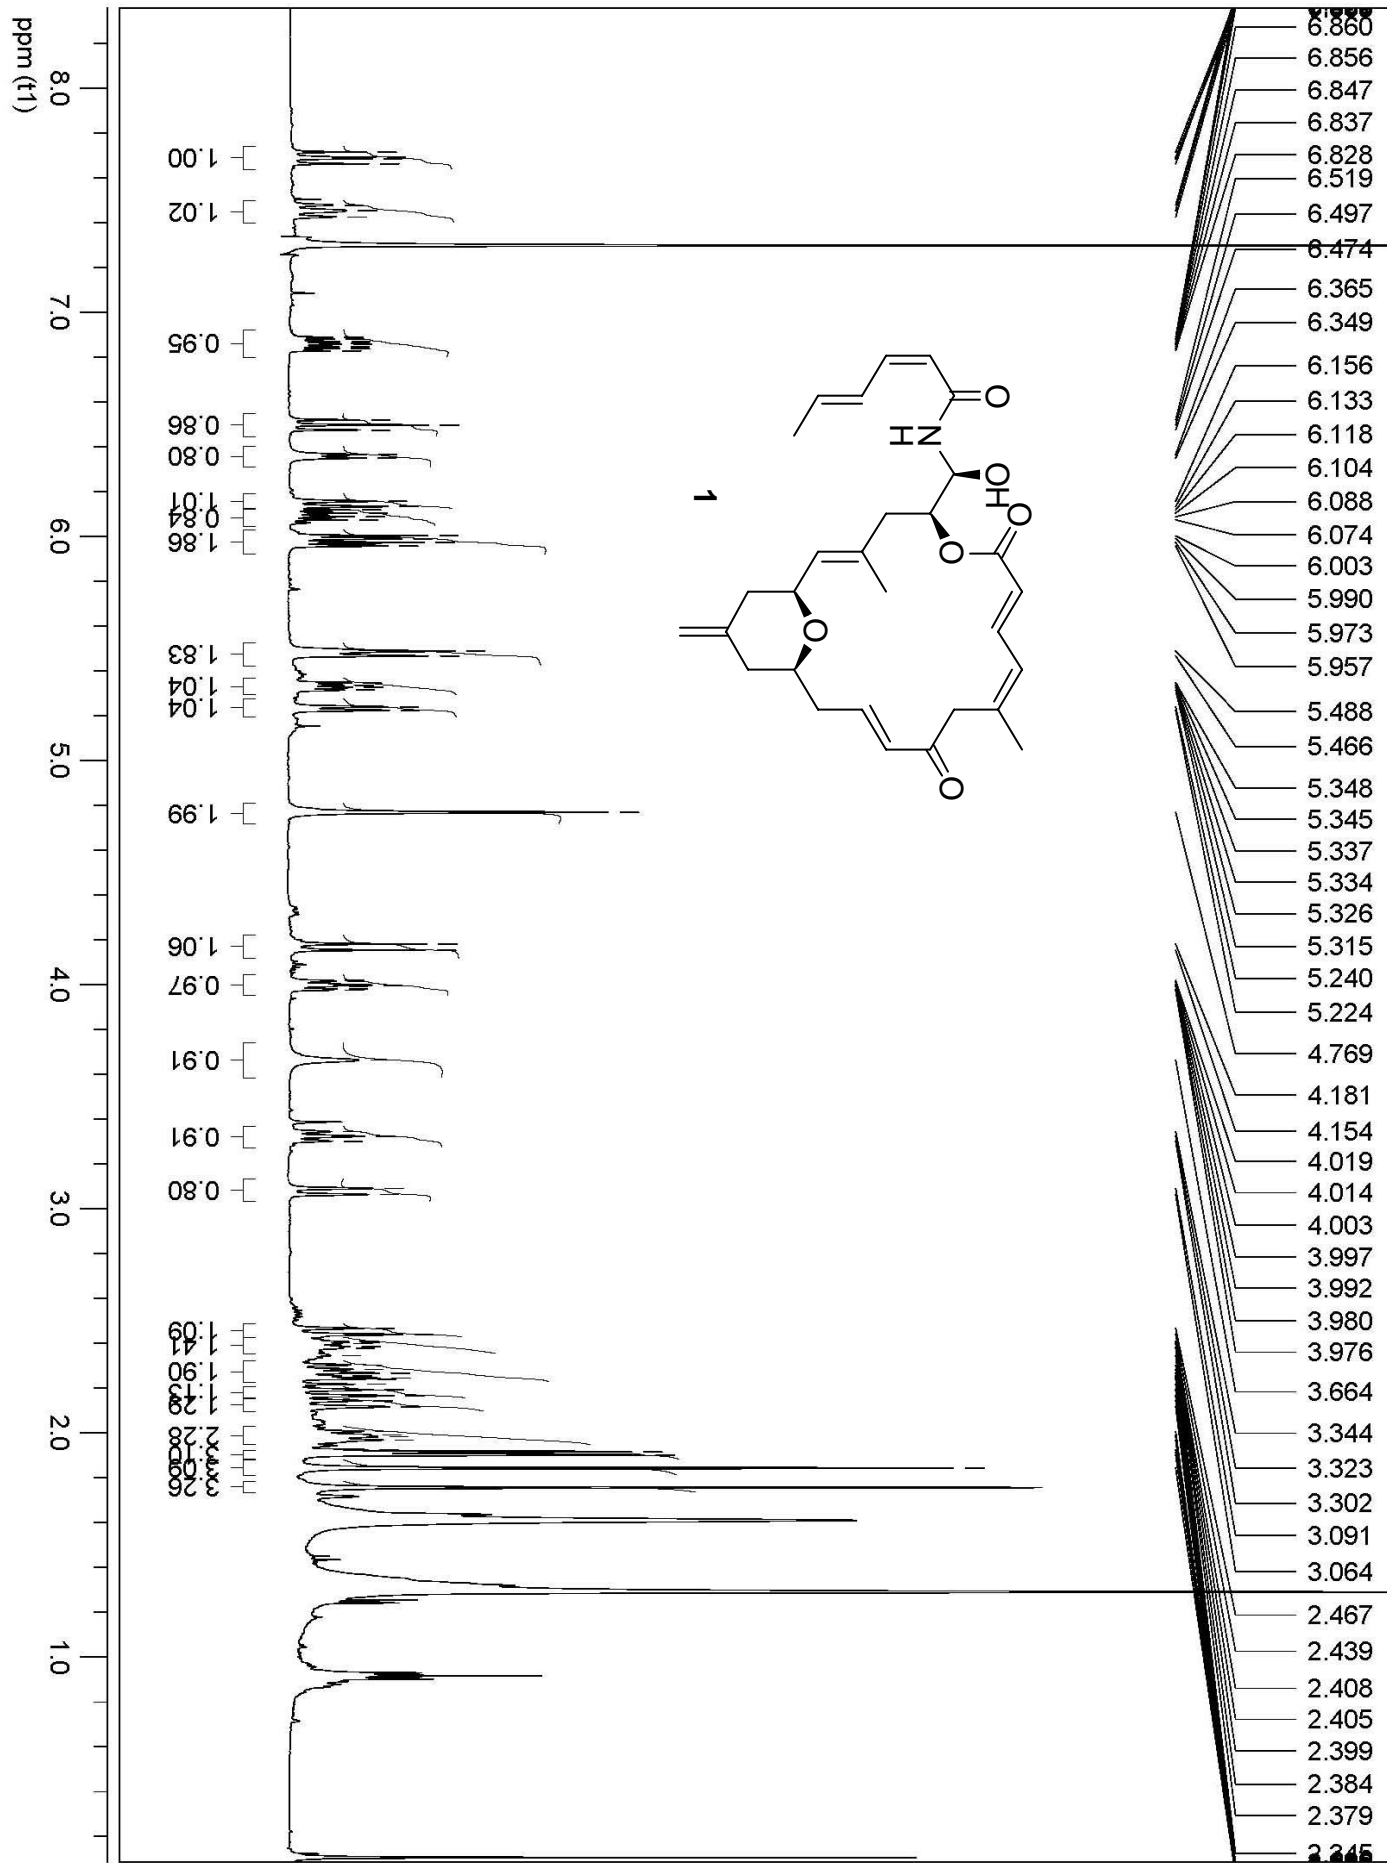



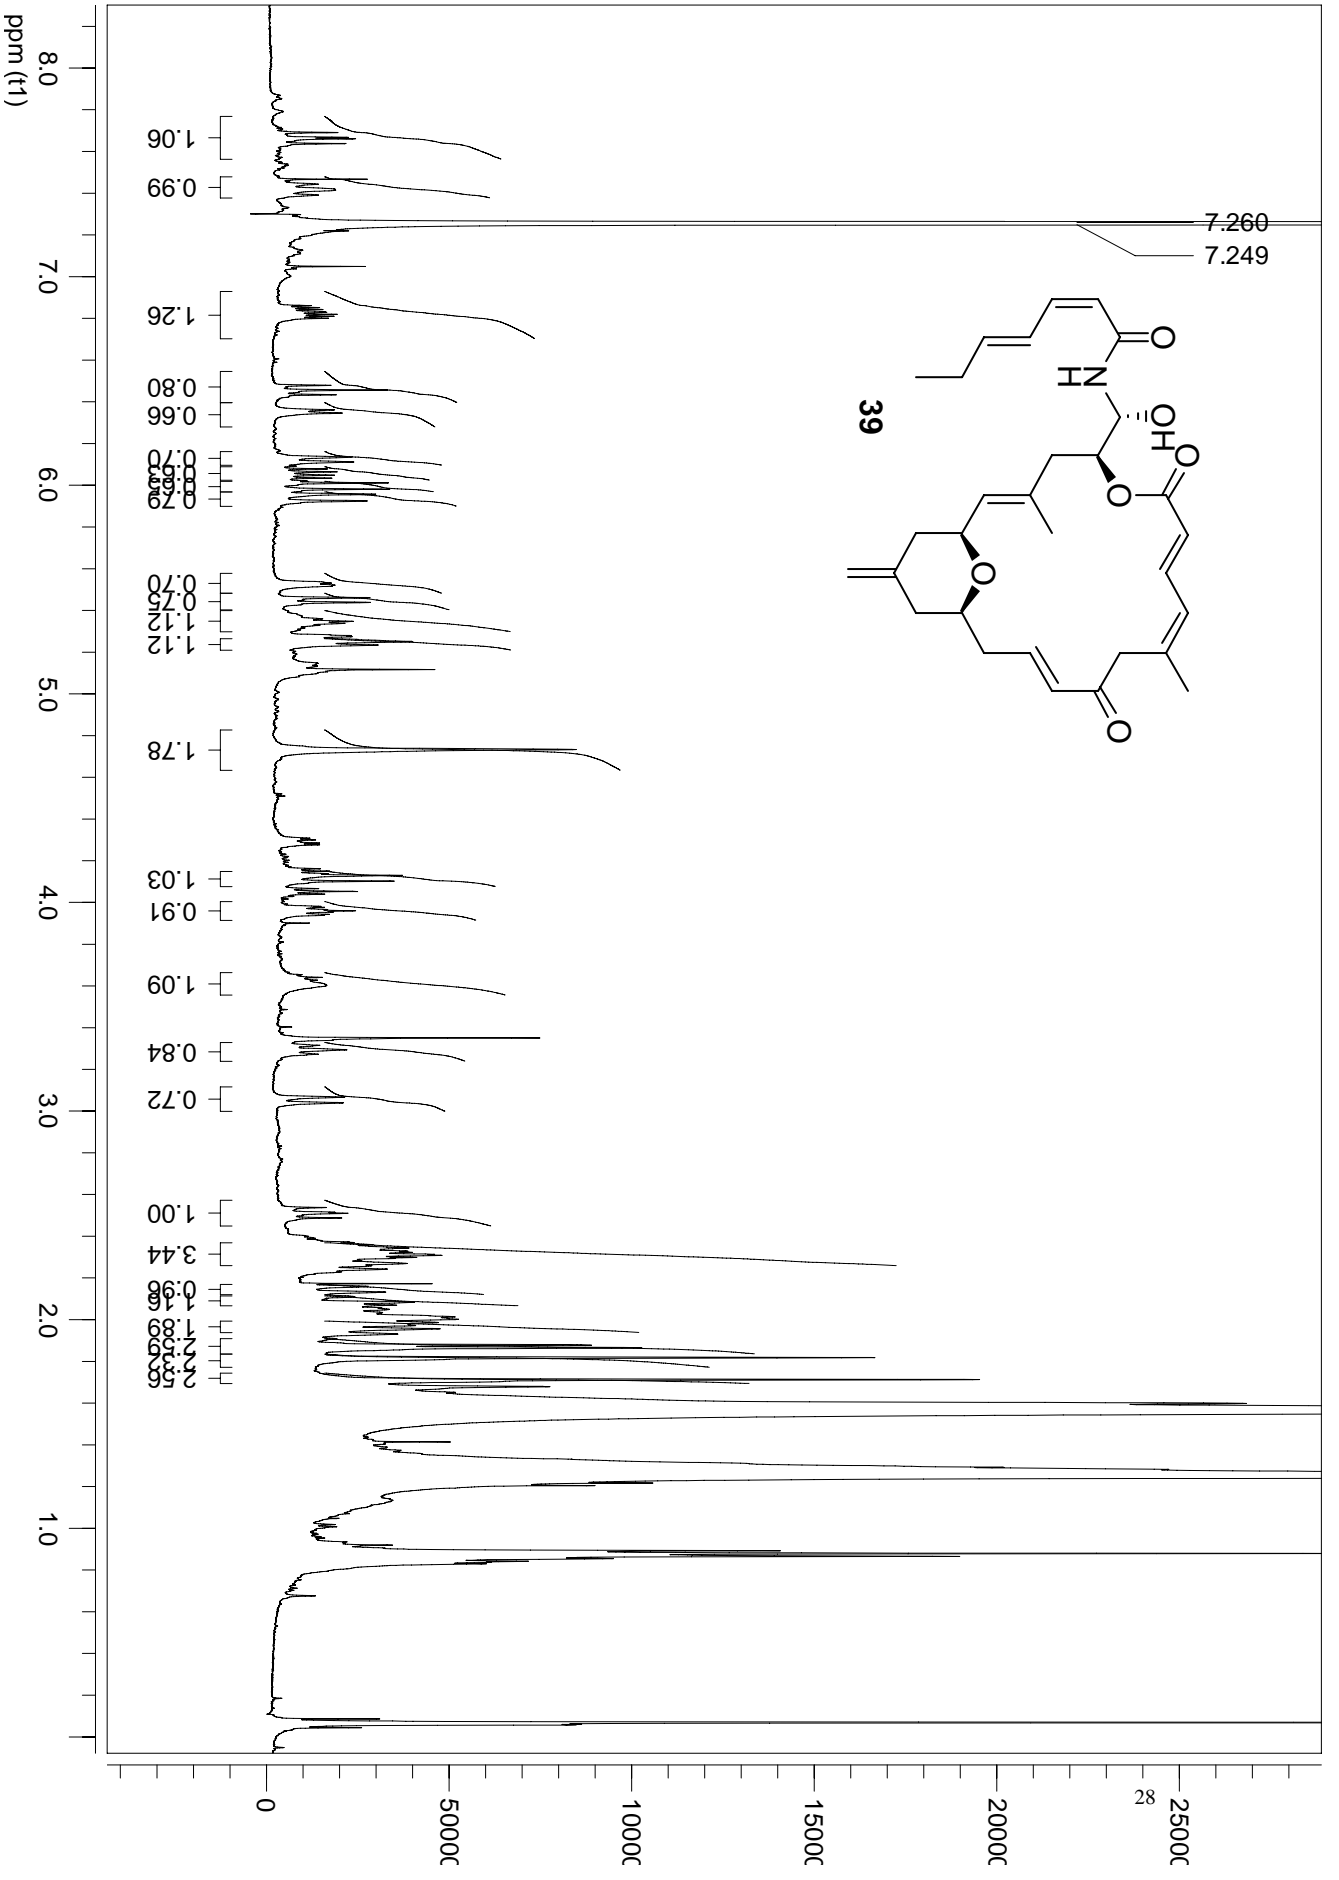

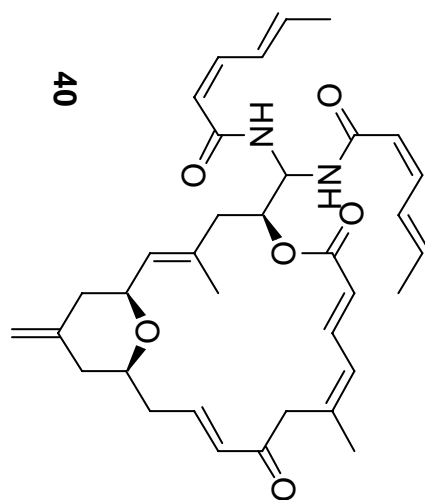

40

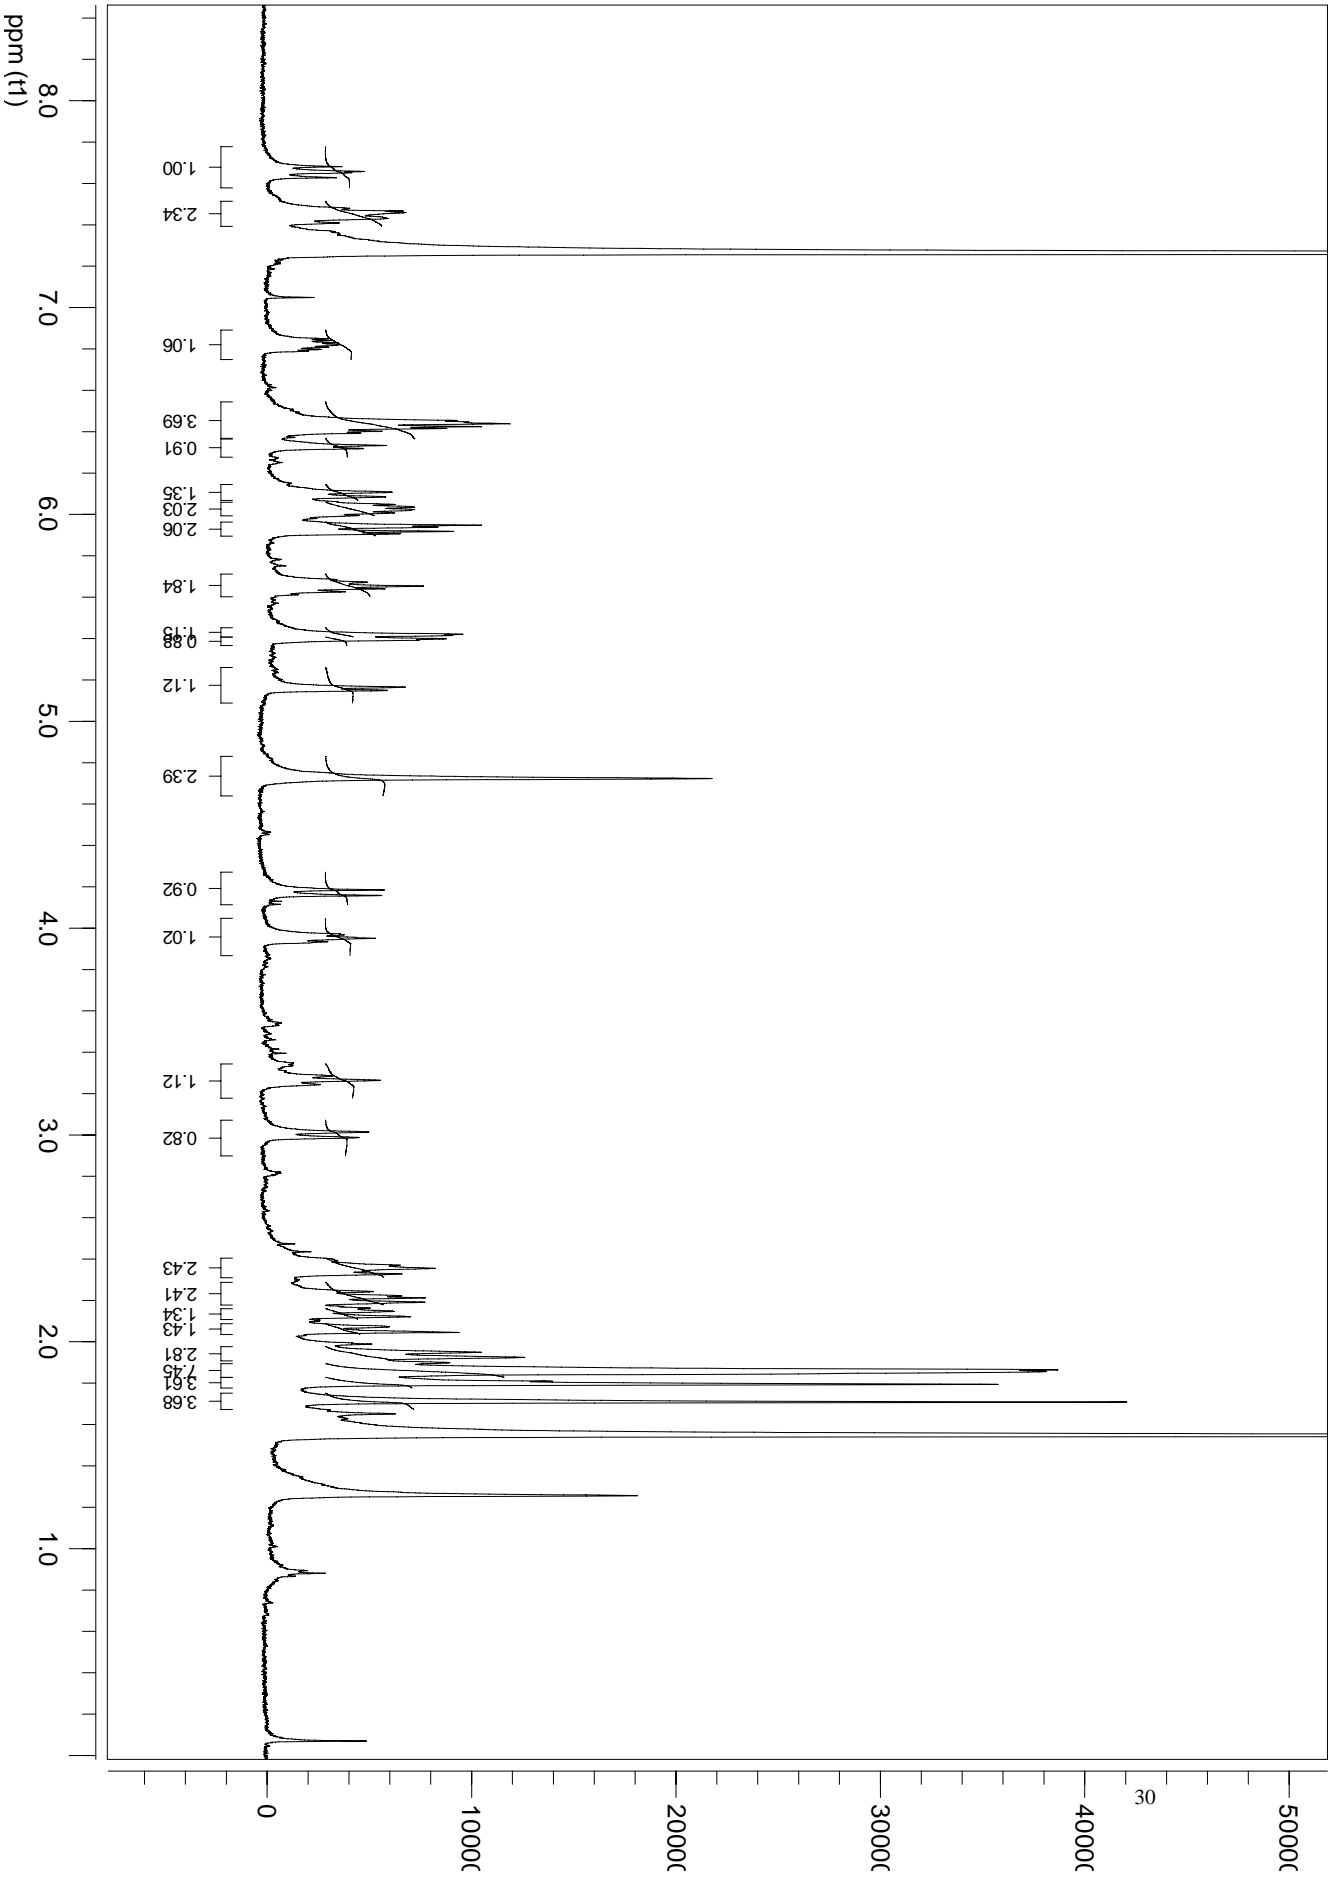

HPLC traces:











Addition of carboxamide to (-)-2 using diphenyl phosphoric acid as catalyst.

Data File E:\CX\PURDUE\DATA\HPLC\HPLC FOR CHX\_07\_042\_02\023-0101.D  
Sample Name: chx\_07\_042\_02

```
=====
Acq. Operator   : Xu Cheng                      Seq. Line :    1
Acq. Instrument : Instrument 2                  Location  : Vial 23
Injection Date  : 3/24/2011 7:05:31 PM        Inj       :    1
                                                Inj Volume: 8.000 µl

Acq. Method    : C:\CHEM32\1\METHODS\XU CHENG\50T0505254.M
Last changed   : 3/24/2011 7:00:53 PM by Xu Cheng
Analysis Method: C:\CHEM32\1\METHODS\DEF_LC.M
Last changed   : 5/8/2011 12:35:14 AM
                (modified after loading)
=====
```

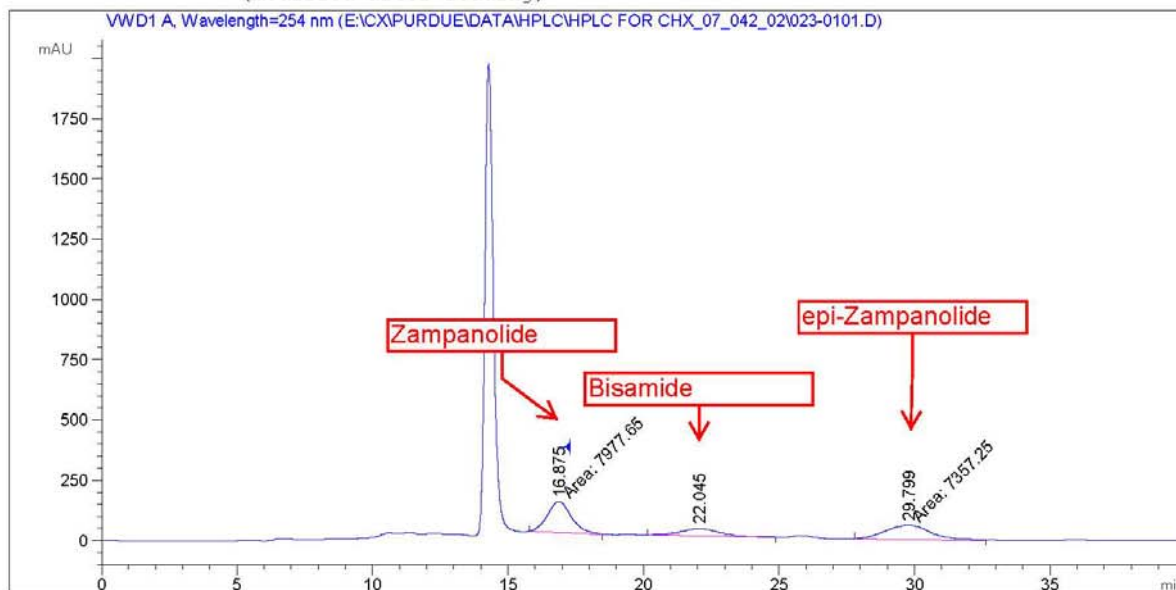

=====  
Area Percent Report  
=====

```
Sorted By      :      Signal
Multiplier:    :      1.0000
Dilution:     :      1.0000
Use Multiplier & Dilution Factor with ISTDs
```

Signal 1: VWD1 A, Wavelength=254 nm

| Peak # | RetTime [min] | Type | Width [min] | Area mAU *s | Height [mAU] | Area %  |
|--------|---------------|------|-------------|-------------|--------------|---------|
| 1      | 16.875        | MM   | 1.0359      | 7977.64941  | 128.35519    | 43.5451 |
| 2      | 22.045        | BB   | 1.4854      | 2985.51001  | 30.00826     | 16.2961 |
| 3      | 29.799        | MM   | 2.0446      | 7357.25000  | 59.97296     | 40.1588 |



Addition of carboxamide to (-)-2 using (S)-TRIP as catalyst.  
 Data File F:\HPLC FOR CHX\_07\_065\_01\051-0100.D  
 Sample Name: chx\_07\_065\_01

```

=====
Acq. Operator   : Xu Cheng                      Seq. Line :    1
Acq. Instrument : Instrument 2                  Location  : Vial 51
Injection Date  : 4/21/2011 4:49:57 PM        Inj       :    1
                                                Inj Volume: 2.000 µl
Acq. Method    : C:\CHEM32\1\METHODS\XU CHENG\50TO505254.M
Last changed   : 4/21/2011 4:48:26 PM by Xu Cheng
Analysis Method: C:\CHEM32\1\METHODS\USER METHODS\XU CHENG\50TO5005254.M
Last changed   : 3/10/2011 5:46:27 PM by Xu Cheng
=====
  
```

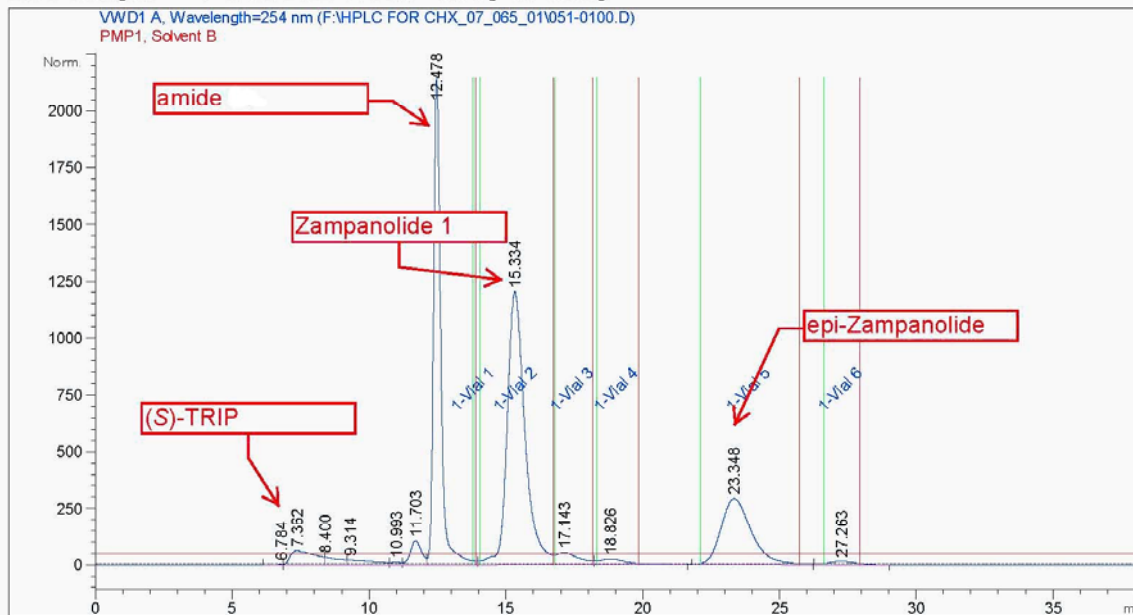

Fraction Information

Fraction collection using a timetable

| Frac # | Well # | Location | Volume [µl] | BeginTime [min] | EndTime [min] | Reason | Mass |
|--------|--------|----------|-------------|-----------------|---------------|--------|------|
| 1      | 1      | 1-Vial 1 | 77.19       | 13.8000         | 13.9085       | VWD1   |      |
| 2      | 1      | 1-Vial 2 | 1364.27     | 14.0504         | 16.7331       | VWD1   |      |
| 3      | 1      | 1-Vial 3 | 713.13      | 16.7920         | 18.1725       | VWD1   |      |
| 4      | 1      | 1-Vial 4 | 786.04      | 18.3360         | 19.8623       | VWD1   |      |
| 5      | 1      | 1-Vial 5 | 1824.17     | 22.1252         | 25.7277       | VWD1   |      |
| 6      | 1      | 1-Vial 6 | 673.23      | 26.6266         | 27.9273       | VWD1   |      |
